# Supplementary material for: Co-catalyzed highly selective C(sp3)–H nitration
Source: Royal Society of Chemistry journal article supplement (doi:10.1039/c7cc04433j), 2017-01-01

## Supporting Information

*for*

### **Co-Catalyzed Highly Selective C(sp<sup>3</sup>)-H Nitration**

Yao Zhou, Zhonghe Tang and Qiuling Song\*

Institute of Next Generation Matter Transformation, College of Chemical Engineering,  
College of Materials Science & Engineering at Huaqiao University, 668 Jimei Blvd,  
Xiamen, Fujian, 361021, P. R. China

Fax:86-592-6162990; email: qsong@hqu.edu.cn

## Table of Contents

|                                                        |    |
|--------------------------------------------------------|----|
| 1. General information.....                            | 3  |
| 2. General procedure for starting materials.....       | 4  |
| 3. Screening of Conditions.....                        | 5  |
| 4. General process for the synthesis of <b>2</b> ..... | 6  |
| 5. The reaction of other heterocycles .....            | 7  |
| 6. Crystal data of <b>2a</b> .....                     | 7  |
| 7. Characterization data for products .....            | 9  |
| 8. NMR spectroscopic data .....                        | 16 |

## 1、 General information

All chemicals were purchased from Adamas Reagent, energy chemical company, J&K Scientific Ltd, Bide Pharmatech Ltd and Tansoole. The reagents and solvents were purchased from commercial suppliers and used without further purification. Reactions were monitored by TLC or GC-MS analysis. Flash column chromatography was performed over silica gel (200-300 mesh).

$^1\text{H}$ -NMR and  $^{13}\text{C}$ -NMR spectra were recorded in  $\text{CDCl}_3$  on a Bruker Avance 500 spectrometer (500 MHz  $^1\text{H}$ , 125 MHz  $^{13}\text{C}$ ) at room temperature. Chemical shifts were reported in ppm on the scale relative to  $\text{CDCl}_3$  ( $\delta = 7.26$  for  $^1\text{H}$ -NMR ,  $\delta = 77.00$  for  $^{13}\text{C}$ -NMR) as an internal reference. High resolution mass spectra were recorded using a Thermo Fisher Scientific LTQ FT Ultra or Waters Micromass GCT Premier instrument. Coupling constants ( $J$ ) were reported in Hertz (Hz).

## 2、 General procedure for starting materials

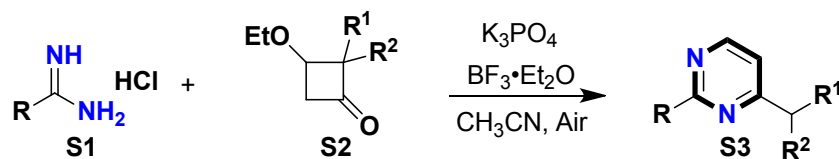

In a dried sealed tube were placed amidine **S1** (2 mmol, 1 equiv) and  $\text{K}_3\text{PO}_4$  (636.8 mg, 3 mmol, 1.5 equiv) in  $\text{CH}_3\text{CN}$  (10 mL). The resulting mixture was stirred at room temperature for 1 h. Then, cyclobutanones **S2** (3 mmol, 1.5 equiv) and  $\text{BF}_3 \cdot \text{Et}_2\text{O}$  (426 mg, 3 mmol, 1.5 equiv) in  $\text{CH}_3\text{CN}$  (5 mL) were added to the resulting solution. The tube was stirred at 80 °C for 18 h. Upon completion of the reaction, the solvent was evaporated under reduced pressure and the residue was purified by flash column chromatography (silica gel, petroleum ether:EtOAc = 50:1, v/v) to give the desired pyrimidine product **S3**.<sup>1</sup>

<sup>1</sup> Zhou, Y.; Tang, Z.; Song, Q. *Adv. Synth. Catal.* **2017**, 359, 952.

### 3. Screening of Conditions

**Table S1 Optimization of the reaction with 1a and *t*-BuONO**

| <b>1a</b>          | <b>2a</b>                            | <b>3a</b> | <b>3aa (N.D.)</b> |             |                        |
|--------------------|--------------------------------------|-----------|-------------------|-------------|------------------------|
| entry <sup>a</sup> | catalyst                             | T (°C)    | solvent           | product     | yield (%) <sup>b</sup> |
| 1                  | Pd(OAc) <sub>2</sub>                 | 100       | PhCl              | <b>3a</b>   | 67 <sup>c</sup>        |
| 2 <sup>d</sup>     | [IrCp*Cl <sub>2</sub> ] <sub>2</sub> | 100       | PhCl              | <b>N.D.</b> | -                      |
| 3 <sup>e</sup>     | [RhCp*Cl <sub>2</sub> ] <sub>2</sub> | 100       | PhCl              | <b>N.D.</b> | -                      |
| 4                  | Cp*Co(CO)I <sub>2</sub>              | 100       | PhCl              | <b>2a</b>   | 47                     |
| 5                  | Cu(OAc) <sub>2</sub>                 | 100       | PhCl              | <b>2a</b>   | 30                     |
| 6                  | Co(OAc) <sub>2</sub>                 | 100       | PhCl              | <b>2a</b>   | 62 <sup>c</sup>        |
| 7                  | CoI <sub>2</sub>                     | 100       | PhCl              | <b>2a</b>   | 38                     |
| 8                  | CoBr <sub>2</sub>                    | 100       | PhCl              | <b>2a</b>   | 56                     |
| 9                  | Co(acac) <sub>2</sub>                | 100       | PhCl              | <b>2a</b>   | 35                     |
| 10                 | Co(OAc) <sub>2</sub>                 | 80        | PhCl              | <b>2a</b>   | 50                     |
| 11                 | Co(OAc) <sub>2</sub>                 | 100       | TFE               | <b>N.D.</b> | -                      |
| 12                 | Co(OAc) <sub>2</sub>                 | 100       | HFIP              | <b>N.D.</b> | -                      |
| 13                 | Co(OAc) <sub>2</sub>                 | 100       | PhMe              | <b>2a</b>   | 30                     |
| 14                 | Co(OAc) <sub>2</sub>                 | 100       | DCE               | <b>2a</b>   | 71                     |
| 15                 | Co(OAc) <sub>2</sub>                 | 100       | Dioxane           | <b>2a</b>   | 46                     |
| 16                 | Co(OAc) <sub>2</sub>                 | 100       | MeCN              | <b>2a</b>   | 80 <sup>c</sup>        |
| 17 <sup>f</sup>    | Co(OAc) <sub>2</sub>                 | 100       | MeCN              | <b>2a</b>   | 77 <sup>c</sup>        |
| 18 <sup>g</sup>    | Co(OAc) <sub>2</sub>                 | 100       | MeCN              | <b>2a</b>   | 50%                    |
| 19 <sup>h</sup>    | Co(OAc) <sub>2</sub>                 | 100       | MeCN              | <b>2a</b>   | 78 <sup>c</sup>        |
| 20 <sup>i</sup>    | Co(OAc) <sub>2</sub>                 | 100       | MeCN              | <b>2a</b>   | 14                     |
| 21                 | -                                    | 100       | MeCN              | <b>2a</b>   | 25 <sup>c</sup>        |

<sup>a</sup> Reaction conditions: **1a** (0.15 mmol), *t*-BuONO (0.45 mmol), catalyst (10 mol%), under O<sub>2</sub>, 24 h. <sup>b</sup> GC yields. <sup>c</sup> Isolated yields. <sup>d</sup> 10 mol% AgNTf<sub>2</sub> was added, under air. <sup>e</sup> 10 mol% AgSF<sub>6</sub> was added, under air. <sup>f</sup> 20 mol% Co(OAc)<sub>2</sub>. <sup>g</sup> 5 mol% Co(OAc)<sub>2</sub>. <sup>h</sup> under air. <sup>i</sup> under N<sub>2</sub>

**Table S2 Screening of other nitrating agents**

| Entry <sup>a</sup> | Nitro source                                                      | Oxidant                                      | Yield of <b>2a</b> <sup>b</sup> |
|--------------------|-------------------------------------------------------------------|----------------------------------------------|---------------------------------|
| 1                  | Ce(NH <sub>4</sub> ) <sub>2</sub> (NO <sub>3</sub> ) <sub>6</sub> | O <sub>2</sub>                               | 49%                             |
| 2                  | AgNO <sub>3</sub>                                                 | O <sub>2</sub>                               | N.D.                            |
| 3                  | NaNO <sub>3</sub>                                                 | O <sub>2</sub>                               | N.D.                            |
| 4                  | Cu(NO <sub>3</sub> ) <sub>2</sub>                                 | O <sub>2</sub>                               | 31%                             |
| 5                  | Fe(NO <sub>3</sub> ) <sub>3</sub> •6H <sub>2</sub> O              | O <sub>2</sub>                               | 40%                             |
| 6                  | <i>i</i> -BuONO                                                   | O <sub>2</sub>                               | 76%                             |
| 7                  | NaNO <sub>2</sub>                                                 | O <sub>2</sub>                               | trace                           |
| 8                  | AgNO <sub>2</sub>                                                 | O <sub>2</sub>                               | trace                           |
| 9 <sup>c</sup>     | AgNO <sub>2</sub>                                                 | K <sub>2</sub> S <sub>2</sub> O <sub>8</sub> | 17%                             |

Reaction conditions: **1** (0.2 mmol), Nitro source (0.6 mmol), 100 °C, under O<sub>2</sub>, 24h. <sup>b</sup> GC yield. <sup>c</sup> K<sub>2</sub>S<sub>2</sub>O<sub>8</sub> (0.6 mmol)

#### 4. General process for the synthesis of **2**

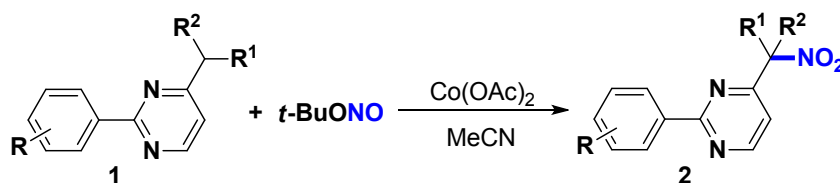

To a mixture of Co(OAc)<sub>2</sub> (5.3 mg, 10 mol%) and **1** (0.3 mmol, 1 equiv) in CH<sub>3</sub>CN (1 mL) was added *t*-BuONO (92 mg, 0.9 mmol, 3 equiv). The resulting mixture was stirred under O<sub>2</sub> at 100 °C for 24 h. Upon completion of the reaction, the solvent was evaporated under reduced pressure and the residue was purified by flash column chromatograph (silica gel, petroleum ether:EtOAc = 25:1, v/v) to give the desired product **2**.

## 5、 The reaction of other heterocycles

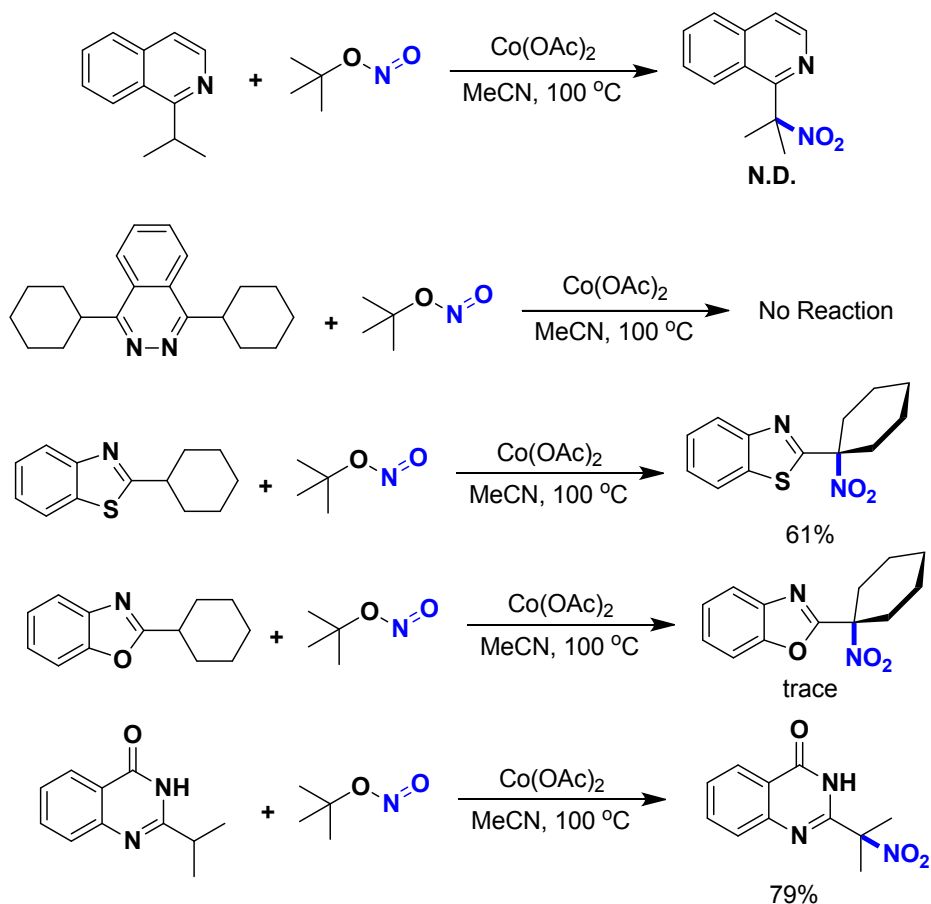

## 6、 Crystal data of 2a

Crystallographic data for compound **2a** (CCDC-1526577) has been deposited with the Cambridge Crystallographic Data Centre, Copies of the data can be obtained, free of charge, on application to CCDC (Email:deposit@ccdc.cam.ac.uk).

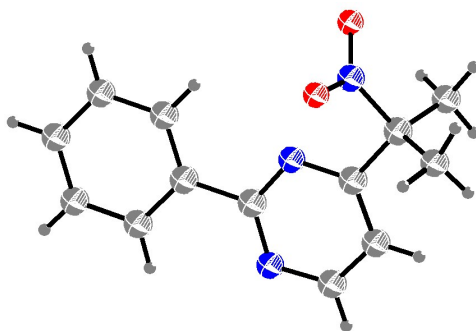

Displacement ellipsoids are drawn at 30% probability level

|                                                                         |                                       |                    |
|-------------------------------------------------------------------------|---------------------------------------|--------------------|
| Bond precision:                                                         | C-C = 0.0062 Å                        | Wavelength=0.71073 |
| Cell:                                                                   | a=7.3577(9)      b=9.9881(11)         | c=16.612(2)        |
|                                                                         | alpha=89.395(10)      beta=88.058(10) | gamma=89.171(10)   |
| Temperature:                                                            | 295 K                                 |                    |
|                                                                         | Calculated                            | Reported           |
| Volume                                                                  | 1219.9(2)                             | 1219.9(3)          |
| Space group                                                             | P -1                                  | P -1               |
| Hall group                                                              | -P 1                                  | -P 1               |
| Moiety formula                                                          | C13 H13 N3 O2                         | C13 H13 N3 O2      |
| Sum formula                                                             | C13 H13 N3 O2                         | C13 H13 N3 O2      |
| Mr                                                                      | 243.26                                | 243.26             |
| Dx,g cm-3                                                               | 1.324                                 | 1.325              |
| Z                                                                       | 4                                     | 4                  |
| Mu (mm-1)                                                               | 0.092                                 | 0.092              |
| F000                                                                    | 512.0                                 | 512.0              |
| F000'                                                                   | 512.22                                |                    |
| h,k,lmax                                                                | 10,13,22                              | 9,13,21            |
| Nref                                                                    | 6545                                  | 4325               |
| Tmin,Tmax                                                               | 0.957,0.973                           | 0.743,1.000        |
| Tmin'                                                                   | 0.955                                 |                    |
| Correction method= # Reported T Limits: Tmin=0.743 Tmax=1.000 AbsCorr = |                                       |                    |
| MULTI-SCAN                                                              |                                       |                    |
| Data completeness= 0.661                                                | Theta(max)= 29.106                    |                    |
| R(reflections)= 0.0862( 2451)                                           | wR2(reflections)= 0.2856( 4325)       |                    |
| S = 1.056                                                               | Npar= 329                             |                    |



## 7、 Characterization data for products

### 4-(2-nitropropan-2-yl)-2-phenylpyrimidine (2a)

The reaction was performed by following the general procedure. The residue was purified by flash column chromatograph (silica gel, petroleum ether:AcOEt = 25:1, v/v) to give the product as a white solid (58.3 mg, 80%). <sup>1</sup>H NMR (500 MHz, CDCl<sub>3</sub>) δ 8.86 (d, *J* = 5.2 Hz, 1H), 8.49 – 8.42 (m, 2H), 7.54 – 7.47 (m, 3H), 7.21 (d, *J* = 5.2 Hz, 1H), 2.06 (s, 6H). <sup>13</sup>C NMR (125 MHz, CDCl<sub>3</sub>) δ = 166.8, 164.4, 158.6, 136.8, 131.2, 128.6, 128.3, 114.3, 91.1, 26.0.

HRMS (EI, *m/z*) calcd for C<sub>13</sub>H<sub>13</sub>N<sub>3</sub>O<sub>2</sub> [M]<sup>+</sup>: 243.1008; found: 243.1011.

### 4-(2-nitropropan-2-yl)-2-(p-tolyl)pyrimidine (2b)

The reaction was performed by following the general procedure. The residue was purified by flash column chromatograph (silica gel, petroleum ether:EtOAc = 20:1, v/v) to give the product as a white solid (53.2 mg, 69%). <sup>1</sup>H NMR (500 MHz, CDCl<sub>3</sub>) δ = 8.82 (d, *J* = 5.2 Hz, 1H), 8.34 (d, *J* = 8.2 Hz, 2H), 7.29 (d, *J* = 8.1 Hz, 2H), 7.16 (d, *J* = 5.2 Hz, 1H), 2.42 (s, 3H), 2.05 (s, 6H). <sup>13</sup>C NMR (125 MHz, CDCl<sub>3</sub>) δ 166.7, 164.5, 158.5, 141.5, 134.2, 129.3, 128.3, 113.9, 91.1, 26.0, 21.5.

HRMS (EI, *m/z*) calcd for C<sub>14</sub>H<sub>15</sub>N<sub>3</sub>O<sub>2</sub> [M]<sup>+</sup>: 257.1164; found: 257.1162.

### 2-([1,1'-biphenyl]-4-yl)-4-(2-nitropropan-2-yl)pyrimidine (2c)

The reaction was performed by following the general procedure. The residue was purified by flash column chromatograph (silica gel, petroleum ether:EtOAc = 20:1, v/v) to give the product as a white solid (79.6 mg, 84%). <sup>1</sup>H NMR (500 MHz, CDCl<sub>3</sub>) δ = 8.87 (d, *J* = 5.2 Hz, 1H), 8.54 (d, *J* = 8.5 Hz, 2H), 7.74 (d, *J* = 8.5 Hz, 2H), 7.68 (d, *J* = 7.1 Hz, 2H), 7.48 (t, *J* = 7.6 Hz, 2H), 7.40 (t, *J* = 7.4 Hz, 1H), 7.21 (d, *J* = 5.2 Hz, 1H), 2.08 (s, 6H). <sup>13</sup>C NMR (125 MHz, CDCl<sub>3</sub>) δ = 166.7, 164.1, 158.6, 143.8, 140.3, 135.7, 128.8, 128.8, 127.8, 127.3, 127.1, 114.2, 91.1, 26.0.

HRMS (ESI, *m/z*) calcd for C<sub>19</sub>H<sub>18</sub>N<sub>3</sub>O<sub>2</sub> [M+H]<sup>+</sup>: 320.1399; found: 320.1394.

### 2-(3-methoxyphenyl)-4-(2-nitropropan-2-yl)pyrimidine (2d)

The reaction was performed by following the general procedure. The residue was purified by flash column chromatograph (silica gel, petroleum ether:AcOEt = 10:1, v/v) to give the product as a yellow oil (54.8 mg, 67%). <sup>1</sup>H NMR (500 MHz, CDCl<sub>3</sub>) δ = 8.85 (d, *J* = 5.2 Hz, 1H), 8.08 – 8.04 (m, 1H), 8.01 (dd, *J* = 2.6, 1.5 Hz, 1H), 7.40 (t, *J* = 8.0 Hz, 1H), 7.20 (d, *J* = 5.2 Hz, 1H), 7.05 (ddd, *J* = 8.2, 2.7, 0.9 Hz, 1H), 3.90 (s, 3H), 2.06 (s, 6H). <sup>13</sup>C NMR (125 MHz, CDCl<sub>3</sub>) δ = 166.7, 164.2, 159.9, 158.5, 138.2, 129.6, 120.9, 117.4, 114.4, 113.1, 91.1, 55.4, 26.0.

HRMS (EI, *m/z*) calcd for C<sub>14</sub>H<sub>15</sub>N<sub>3</sub>O<sub>3</sub> [M]<sup>+</sup>: 273.1113; found: 273.1109.

### 2-(2-ethoxyphenyl)-4-(2-nitropropan-2-yl)pyrimidine (2e)

The reaction was performed by following the general procedure. The residue was purified by flash column chromatograph (silica gel, petroleum ether:EtOAc = 5:1, v/v) to give the product as a yellow oil (50.8 mg, 59%). <sup>1</sup>H NMR (500 MHz, CDCl<sub>3</sub>) δ =

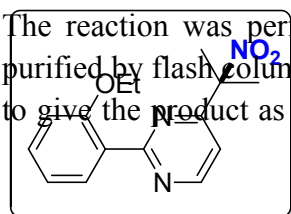

8.88 (d,  $J = 5.3$  Hz, 1H), 7.75 (d,  $J = 1.8$  Hz, 1H), 7.44 – 7.37 (m, 1H), 7.20 (d,  $J = 5.3$  Hz, 1H), 7.07 – 6.99 (m, 2H), 4.10 (q,  $J = 7.0$  Hz, 2H), 2.04 (s, 6H), 1.37 (t,  $J = 7.0$  Hz, 3H).  $^{13}\text{C}$  NMR (125 MHz,  $\text{CDCl}_3$ )  $\delta = 166.4, 165.6, 158.0, 157.4, 131.9, 131.3, 127.8, 120.5, 113.6, 113.3, 91.1, 64.4, 26.0, 14.8$ .

HRMS (ESI,  $m/z$ ) calcd for  $\text{C}_{15}\text{H}_{18}\text{FN}_3\text{O}_3$   $[\text{M}+\text{H}]^+$ : 288.1343; found: 288.1345.

#### 4-(2-nitropropan-2-yl)-2-(3-(trifluoromethyl)phenyl)pyrimidine (2f)

The reaction was performed by following the general procedure. The residue was purified by flash column chromatograph (silica gel, petroleum ether:EtOAc = 20:1, v/v) to give the product as a yellow oil (77.4 mg, 83%).  $^1\text{H}$  NMR (500 MHz,  $\text{CDCl}_3$ )  $\delta = 8.90$  (d,  $J = 5.2$  Hz, 1H), 8.73 (s, 1H), 8.64 (d,  $J = 7.9$  Hz, 1H), 7.75 (d,  $J = 7.7$  Hz, 1H), 7.62 (t,  $J = 7.8$  Hz, 1H), 7.28 (d,  $J = 5.2$  Hz, 1H), 2.08 (s, 6H).  $^{13}\text{C}$  NMR (125 MHz,  $\text{CDCl}_3$ )  $\delta = 167.0, 163.0, 158.8, 137.6, 131.5, 129.1, 127.7$  (q,  $J = 7.4, 3.8$  Hz), 125.2 (q,  $J = 7.8, 3.8$  Hz), 115.0, 91.0, 26.0.

HRMS (EI,  $m/z$ ) calcd for  $\text{C}_{14}\text{H}_{12}\text{F}_3\text{N}_3\text{O}_2$   $[\text{M}]^+$ : 311.0882; found: 311.0884.

#### 2-(4-nitrophenyl)-4-(2-nitropropan-2-yl)pyrimidine (2g)

The reaction was performed by following the general procedure. The residue was purified by flash column chromatograph (silica gel, petroleum ether:EtOAc = 10:1, v/v) to give the product as a white solid (59.6 mg, 69%).  $^1\text{H}$  NMR (500 MHz,  $\text{CDCl}_3$ )  $\delta = 8.94$  (d,  $J = 5.2$  Hz, 1H), 8.62 (d,  $J = 9.0$  Hz, 2H), 8.32 (d,  $J = 9.0$  Hz, 2H), 7.34 (d,  $J = 5.2$  Hz, 1H), 2.08 (s, 6H).  $^{13}\text{C}$  NMR (125 MHz,  $\text{CDCl}_3$ )  $\delta = 167.2, 162.3, 158.9, 149.5, 142.4, 129.3, 123.7, 115.56, 90.9, 26.0$ .

HRMS (ESI,  $m/z$ ) calcd for  $\text{C}_{13}\text{H}_{13}\text{N}_4\text{O}_4$   $[\text{M}+\text{H}]^+$ : 289.0937; found: 289.0932.

#### ethyl4'-(4-(2-nitropropan-2-yl)pyrimidin-2-yl)-[1,1'-biphenyl]-4-

#### carboxylate (2h)

The reaction was performed by following the general procedure. The residue was purified by flash column chromatograph (silica gel, petroleum ether:EtOAc = 10:1, v/v) to give the product as a white solid (95 mg, 81%).  $^1\text{H}$  NMR (500 MHz,  $\text{CDCl}_3$ )  $\delta = 8.87$  (dd,  $J = 5.2, 1.1$  Hz, 1H), 8.54 (d,  $J = 8.2$  Hz, 2H), 8.14 (d,  $J = 8.1$  Hz, 2H), 7.73 (t,  $J = 8.9$  Hz, 4H), 7.23 (d,  $J = 5.2$  Hz, 1H), 4.41 (q,  $J = 7.1$  Hz, 2H), 2.08 (s, 6H), 1.42 (t,  $J = 7.1$  Hz, 3H).  $^{13}\text{C}$  NMR (125 MHz,  $\text{CDCl}_3$ )  $\delta = 166.8, 166.4, 163.9, 158.6, 144.6, 142.6, 136.5, 130.1, 129.6, 128.9, 127.4, 127.0, 114.4, 91.1, 61.0, 26.0, 14.3$ .

HRMS (ESI,  $m/z$ ) calcd for  $\text{C}_{22}\text{H}_{22}\text{N}_3\text{O}_4$   $[\text{M}+\text{H}]^+$ : 392.1610; found: 392.1605.

#### 2-(4-chlorophenyl)-4-(2-nitropropan-2-yl)pyrimidine (2i)

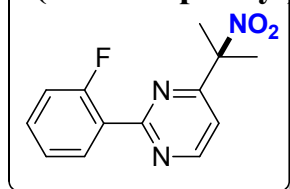

The reaction was performed by following the general procedure. The residue was purified by flash column chromatograph (silica gel, petroleum ether:EtOAc = 25:1, v/v) to give the product as a yellow oil (47.7 mg, 61%). <sup>1</sup>H NMR (500 MHz, CDCl<sub>3</sub>) δ = 8.95 (d, *J* = 5.2 Hz, 1H), 8.12 (td, *J* = 7.8, 1.8 Hz, 1H), 7.52 – 7.46 (m, 1H), 7.29 (d, *J* = 14.3 Hz, 2H), 7.22 (dd, *J* = 11.2, 8.3 Hz, 1H), 2.08 (s, 6H). <sup>13</sup>C NMR (125 MHz, CDCl<sub>3</sub>) δ = 166.9, 163.1 (d, *J* = 5.0 Hz), 161.4 (d, *J* = 255.0 Hz), 158.5, 132.3 (d, *J* = 8.7 Hz), 132.0, 124.1 (d, *J* = 3.8 Hz), 117.0, 116.9, 114.4, 91.1, 26.0. HRMS (EI, *m/z*) calcd for C<sub>13</sub>H<sub>12</sub>FN<sub>3</sub>O<sub>2</sub> [M]<sup>+</sup>: 261.0914; found: 261.0909.

## 2-(4-chlorophenyl)-4-(2-nitropropan-2-yl)pyrimidine (2j)

The reaction was performed following the general procedure. The residue was purified by flash column chromatograph (silica gel, petroleum ether:EtOAc = 25:1, v/v) to give the product as a white solid (59.8 mg, 72%). <sup>1</sup>H NMR (500 MHz, CDCl<sub>3</sub>) δ = 8.85 (d, *J* = 5.2 Hz, 1H), 8.39 (d, *J* = 8.7 Hz, 2H), 7.45 (d, *J* = 8.7 Hz, 2H), 7.22 (d, *J* = 5.2 Hz, 1H), 2.05 (s, 6H). <sup>13</sup>C NMR (125 MHz, CDCl<sub>3</sub>) δ = 166.8, 163.5, 158.7, 137.5, 135.3, 129.7, 128.8, 114.5, 91.0, 26.0. HRMS (EI, *m/z*) calcd for C<sub>13</sub>H<sub>12</sub>ClN<sub>3</sub>O<sub>2</sub> [M]<sup>+</sup>: 277.0618; found: 277.0619.

## 2-(4-bromophenyl)-4-(2-nitropropan-2-yl)pyrimidine (2k)

The reaction was performed by following the general procedure. The residue was purified by flash column chromatograph (silica gel, petroleum ether:EtOAc = 20:1, v/v) to give the product as a white solid (74.1 mg, 77%). <sup>1</sup>H NMR (500 MHz, CDCl<sub>3</sub>) δ = 8.84 (d, *J* = 5.2 Hz, 1H), 8.32 (d, *J* = 8.7 Hz, 2H), 7.61 (d, *J* = 8.7 Hz, 2H), 7.23 (d, *J* = 5.2 Hz, 1H), 2.05 (s, 6H). <sup>13</sup>C NMR (125 MHz, CDCl<sub>3</sub>) δ = 166.9, 163.6, 158.7, 135.8, 131.8, 129.9, 126.0, 114.6, 91.0, 26.0. HRMS (EI, *m/z*) calcd for C<sub>13</sub>H<sub>12</sub>BrN<sub>3</sub>O<sub>2</sub> [M]<sup>+</sup>: 321.0113; found: 321.0118.

## 1-(2-fluorobenzyl)-3-(4-(2-nitropropan-2-yl)pyrimidin-2-yl)-1H-pyrazolo[4,3-b]pyridine (2l)

The reaction was performed by following the general procedure. The residue was purified by flash column chromatograph (silica gel, petroleum ether:AcOEt = 2:1, v/v) to give the product as a yellow oil (77.6 mg, 66%). <sup>1</sup>H NMR (500 MHz, CDCl<sub>3</sub>) δ = 8.97 (d, *J* = 5.2 Hz, 1H), 8.76 (dd, *J* = 8.1, 1.6 Hz, 1H), 8.61 (dd, *J* = 4.5, 1.6 Hz, 1H), 7.33 – 7.28 (m, 2H), 7.23 (m, 1H), 7.04 (dd, *J* = 16.9, 8.5 Hz, 2H), 6.96 (t, *J* = 8.0 Hz, 1H), 5.96 (s, 2H), 2.10 (s, 6H). <sup>13</sup>C NMR (125 MHz, CDCl<sub>3</sub>) δ = 167.2, 161.2, 160.8, 159.2, 151.6, 149.5, 140.7, 132.6, 129.3 (d, *J* = 8.0 Hz), 129.2 (d, *J* = 3.6 Hz),

124.1 (d,  $J = 3.6$  Hz), 123.8 (d,  $J = 14.5$  Hz), 118.8, 115.4, 115.3 (d,  $J = 6.6$  Hz), 114.6, 90.8, 44.9 (d,  $J = 5.0$  Hz), 26.0.

HRMS (ESI,  $m/z$ ) calcd for  $C_{20}H_{18}FN_6O_2[M+H]^+$ : 393.1475; found: 393.1470.

#### 4-(2-nitropropan-2-yl)-2-(1H-pyrazol-1-yl)pyrimidine (2m)

The reaction was performed by following the general procedure. The residue was purified by flash column chromatograph (silica gel, petroleum ether:EtOAc = 2:1, v/v) to give the product as a yellow oil (54.5 mg, 78%).  $^1H$  NMR (500 MHz,  $CDCl_3$ )  $\delta$  = 8.86 (d,  $J = 5.2$  Hz, 1H), 8.57 (dd,  $J = 2.7, 0.6$  Hz, 1H), 7.86 (d,  $J = 0.9$  Hz, 1H), 7.24 (d,  $J = 5.2$  Hz, 1H), 6.52 (dd,  $J = 2.7, 1.6$  Hz, 1H), 2.07 (s, 6H).  $^{13}C$  NMR (125 MHz,  $CDCl_3$ )  $\delta$  = 168.6, 160.6, 155.6, 144.1, 129.4, 114.0, 109.0, 90.7, 25.9.

HRMS (EI,  $m/z$ ) calcd for  $C_{10}H_{11}N_5O_2[M]^+$ : 233.0913; found: 233.0910.

#### 4-(3-nitropentan-3-yl)-2-phenylpyrimidine (2o)

The reaction was performed by following the general procedure. The residue was purified by flash column chromatograph (silica gel, petroleum ether:EtOAc = 25:1, v/v) to give the product as a yellow oil (58.4 mg, 71%).  $^1H$  NMR (500 MHz,  $CDCl_3$ )  $\delta$  = 8.87 (d,  $J = 5.2$  Hz, 1H), 8.50 – 8.45 (m, 2H), 7.52 (dd,  $J = 5.4, 1.9$  Hz, 3H), 7.19 (d,  $J = 5.2$  Hz, 1H), 2.57 (dq,  $J = 14.3, 7.1$  Hz, 4H), 0.90 (t,  $J = 7.5$  Hz, 6H).  $^{13}C$  NMR (125 MHz,  $CDCl_3$ )  $\delta$  = 165.8, 164.3, 158.1, 136.9, 131.1, 128.6, 128.3, 115.9, 98.6, 27.6, 8.1.

HRMS (ESI,  $m/z$ ) calcd for  $C_{15}H_{18}N_3O_2[M+H]^+$ : 272.1399; found: 272.1394.

#### 4-(2-nitrobutan-2-yl)-2-phenylpyrimidine (2p)

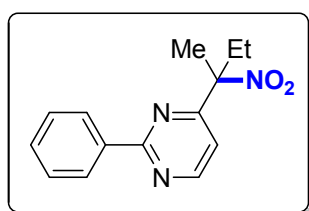

The reaction was performed by following the general procedure. The residue was purified by flash column chromatograph (silica gel, petroleum ether:EtOAc = 25:1, v/v) to give the product as a yellow oil (59.6 mg, 77%).  $^1H$  NMR (500 MHz,  $CDCl_3$ )  $\delta$  = 8.85 (d,  $J = 5.2$  Hz, 1H), 8.48 – 8.42 (m, 2H), 7.52 – 7.47 (m, 3H), 7.18 (d,  $J = 5.2$  Hz, 1H), 2.59 (dq,  $J = 14.7, 7.4$  Hz, 1H), 2.51 – 2.40 (m, 1H), 2.00 (s, 3H), 0.99 (t,  $J = 7.4$  Hz, 3H).  $^{13}C$  NMR (125 MHz,  $CDCl_3$ )  $\delta$  = 166.6, 164.3, 158.4, 136.8, 131.2, 128.6, 128.3, 114.8, 95.0, 31.4, 22.5, 8.5.

HRMS (ESI,  $m/z$ ) calcd for  $C_{15}H_{18}N_3O_2[M+H]^+$ : 258.1237; found: 272.1238.

#### 4-(1-nitrocyclohexyl)-2-phenylpyrimidine (2q)

The reaction was performed by following the general procedure. The residue was purified by flash column chromatograph (silica gel, petroleum ether:EtOAc = 25:1,

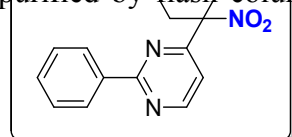

v/v) to give the product as a yellow oil (62.8 mg, 74%).  $^1\text{H}$  NMR (500 MHz,  $\text{CDCl}_3$ )  $\delta$  = 8.83 (d,  $J$  = 5.2 Hz, 1H), 8.46 (dd,  $J$  = 6.6, 3.2 Hz, 2H), 7.49 (dd,  $J$  = 5.2, 1.9 Hz, 3H), 7.21 (d,  $J$  = 5.2 Hz, 1H), 2.78 (d,  $J$  = 14.1 Hz, 2H), 2.37 (t,  $J$  = 14.3 Hz, 2H), 1.81 – 1.66 (m, 4H), 1.61 – 1.55 (m, 2H).  $^{13}\text{C}$  NMR (125 MHz,  $\text{CDCl}_3$ )  $\delta$  = 166.2, 164.4, 158.6, 136.9, 131.2, 128.6, 128.3, 114.5, 94.9, 33.9, 24.4, 22.4. HRMS (ESI,  $m/z$ ) calcd for  $\text{C}_{16}\text{H}_{18}\text{N}_3\text{O}_2$   $[\text{M}+\text{H}]^+$ : 284.1399; found: 284.1394.

#### 4-(1-nitrocyclopentyl)-2-phenylpyrimidine (2r)

The reaction was performed following the general procedure. The residue was purified by flash column chromatograph (silica gel, petroleum ether:EtOAc = 25:1, v/v) to give the product as a yellow oil (64.4 mg, 80%). <sup>1</sup>H NMR (500 MHz, CDCl<sub>3</sub>)  $\delta$  = 8.82 (d,  $J$  = 5.2 Hz, 1H), 8.52 – 8.42 (m, 2H), 7.55 – 7.45 (m, 3H), 7.17 (d,  $J$  = 5.2 Hz, 1H), 3.06 – 2.96 (m, 2H), 2.61 – 2.50 (m, 2H), 1.99 – 1.89 (m, 4H). <sup>13</sup>C NMR (125 MHz, CDCl<sub>3</sub>)  $\delta$  = 165.9, 164.3, 158.4, 136.9, 131.1, 128.6, 128.3, 115.0, 103.0, 37.7, 24.1.

HRMS (EI, m/z) calcd for C<sub>15</sub>H<sub>15</sub>N<sub>3</sub>O<sub>2</sub> [M]<sup>+</sup>: 269.1164; found: 269.1168.

#### 2-cyclopropyl-4-(1-nitrocyclohexyl)pyrimidine (2u)

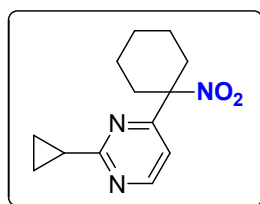

The reaction was performed by following the general procedure. The residue was purified by flash column chromatograph (silica gel, petroleum ether: EtOAc = 25:1, v/v) to give the product as a yellow oil (50.4 mg, 69%). <sup>1</sup>H NMR (500 MHz, CDCl<sub>3</sub>)  $\delta$  = 8.57 (d,  $J$  = 5.3 Hz, 1H), 7.03 (d,  $J$  = 5.3 Hz, 1H), 2.66 (d,  $J$  = 14.1 Hz, 2H), 2.28 – 2.18 (m, 3H), 1.70 – 1.64 (m, 3H), 1.57 – 1.48 (m, 2H), 1.43 – 1.34 (m, 1H), 1.13 – 1.09 (m, 2H), 1.09 – 1.05 (m, 2H). <sup>13</sup>C NMR (125 MHz, CDCl<sub>3</sub>)  $\delta$  = 172.3, 165.7, 157.9, 113.2, 94.7, 33.7, 24.3, 22.3, 18.2, 11.3.

HRMS (ESI, m/z) calcd for [C<sub>13</sub>H<sub>18</sub>N<sub>3</sub>O<sub>2</sub>]: 248.1394; found: 248.1390.

#### 2-cyclopropyl-4-(1-nitrocyclopentyl)pyrimidine (2v)

The reaction was performed by following the general procedure. The residue was purified by flash column chromatograph (silica gel, petroleum ether: EtOAc = 25:1, v/v) to give the product as a yellow oil (56.6 mg, 81%). <sup>1</sup>H NMR (500 MHz, CDCl<sub>3</sub>)  $\delta$  = 8.56 (d,  $J$  = 5.2 Hz, 1H), 7.00 (d,  $J$  = 5.2 Hz, 1H), 2.94 – 2.84 (m, 2H), 2.45 – 2.35 (m, 2H), 2.27 – 2.19 (m, 1H), 1.91 – 1.82 (m, 4H), 1.13 – 1.09 (m, 2H), 1.09 – 1.04 (m, 2H). <sup>13</sup>C NMR (125 MHz, CDCl<sub>3</sub>)  $\delta$  = 172.2, 165.4, 157.7, 113.8, 102.8, 37.4, 23.9, 18.2, 11.3.

HRMS (ESI, m/z) calcd for C<sub>12</sub>H<sub>16</sub>N<sub>3</sub>O<sub>2</sub> [M+H]<sup>+</sup>: 234.1237; found: 234.1232.

#### 2-cyclopropyl-4-(2-nitropropan-2-yl)pyrimidine (2w)

The reaction was performed by following the general procedure. The residue was purified by flash column chromatograph (silica gel, petroleum ether: EtOAc = 25:1, v/v) to give the product as a yellow oil (46.6 mg, 75%). <sup>1</sup>H NMR (500 MHz, CDCl<sub>3</sub>)  $\delta$  = 8.60 (d,  $J$  = 5.2 Hz, 1H), 7.04 (d,  $J$  = 5.3 Hz, 1H), 2.27 – 2.21 (m, 1H), 1.94 (s, 6H), 1.13 – 1.09 (m, 2H), 1.09–1.05 (m, 2H). <sup>13</sup>C NMR (125 MHz, CDCl<sub>3</sub>)  $\delta$  = 172.3, 166.3, 157.9, 113.0, 90.9, 25.89, 18.19, 11.39.

HRMS (ESI, m/z) calcd for C<sub>10</sub>H<sub>14</sub>N<sub>3</sub>O<sub>2</sub> [M+H]<sup>+</sup>: 208.1081; found: 208.1080.

#### 2-(2-cyclopropylpyrimidin-4-yl)propan-2-amine (5) (CAS: No.

1192801-28-7)<sup>2</sup>

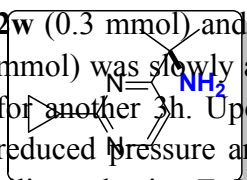 **2w** (0.3 mmol) and NiCl<sub>2</sub> (10 mol %) were dissolved in MeOH (2 mL), NaBH<sub>4</sub> (4.5 mmol) was slowly added (in portions) at 0 °C and the mixture was continued to react for another 3h. Upon completion of the reaction, the solvent was evaporated under reduced pressure and the residue was purified by flash column chromatography on silica gel using EtOAc as eluent to give the product **5** as a yellow oil (47.5 mg, 89%).  
<sup>1</sup>H NMR (500 MHz, CDCl<sub>3</sub>) δ = 8.48 (d, *J* = 5.3 Hz, 1H), 7.13 (d, *J* = 5.3 Hz, 1H), 4.48 (br s, 2H), 2.24 – 2.19 (m, 1H), 1.51 (s, 6H), 1.15 – 1.12 (m, 2H), 1.03 – 0.99 (m, 2H). <sup>13</sup>C NMR (125 MHz, CDCl<sub>3</sub>) δ = 173.6, 171.5, 157.2, 112.3, 54.7, 29.1, 18.1, 10.9.

---

<sup>2</sup> B. Schaus and J. Mehnert, 2009, WO2009/131815 A1.

## 8、NMR spectroscopic data

### 4-(2-nitropropan-2-yl)-2-phenylpyrimidine (2a)

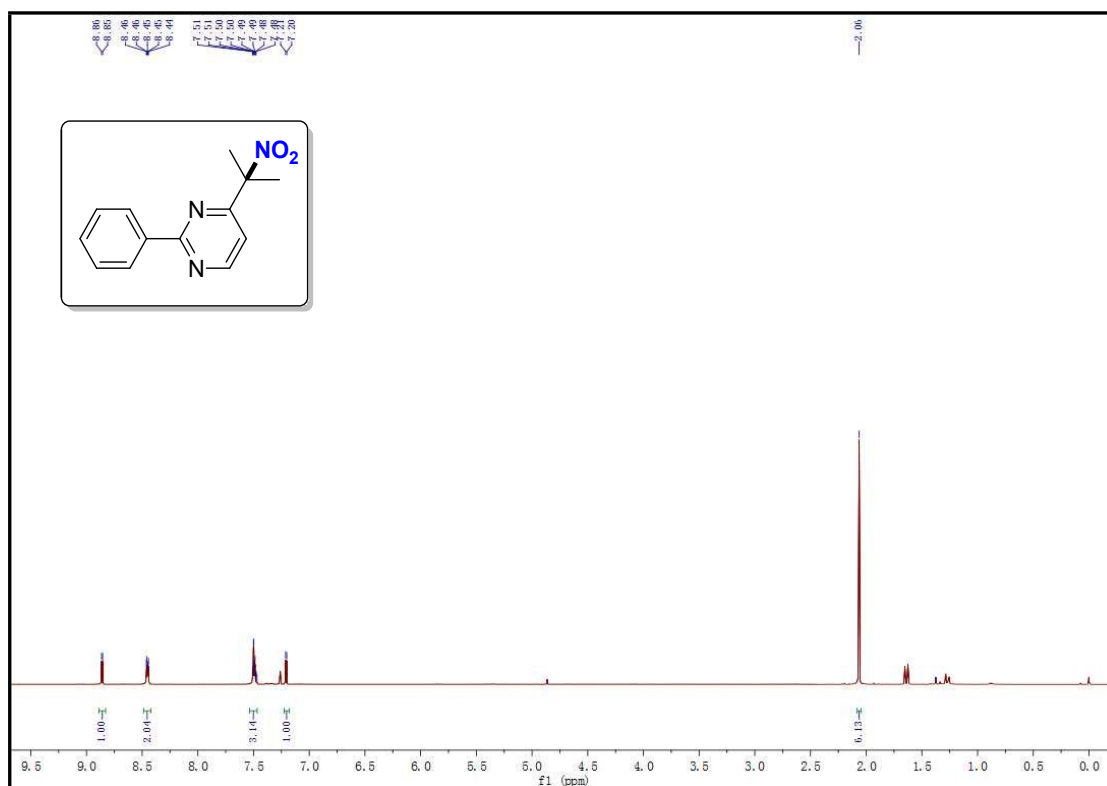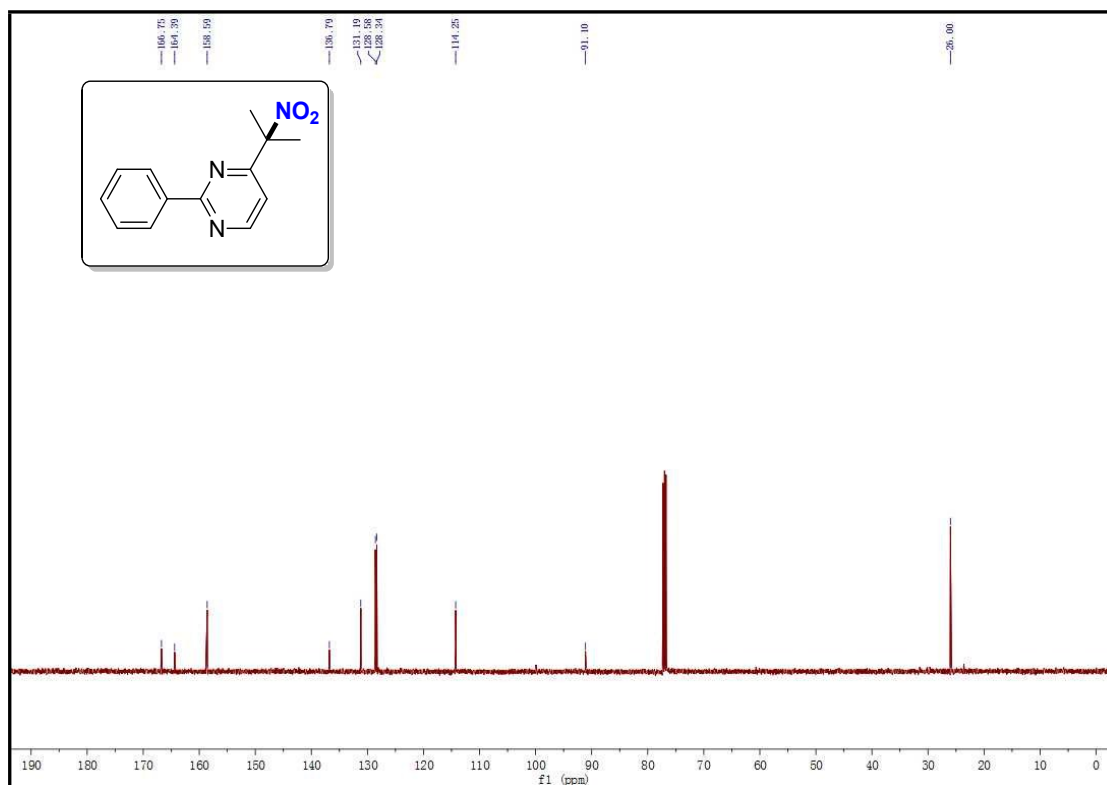



# 4-(2-nitropropan-2-yl)-2-(p-tolyl)pyrimidine (2b)

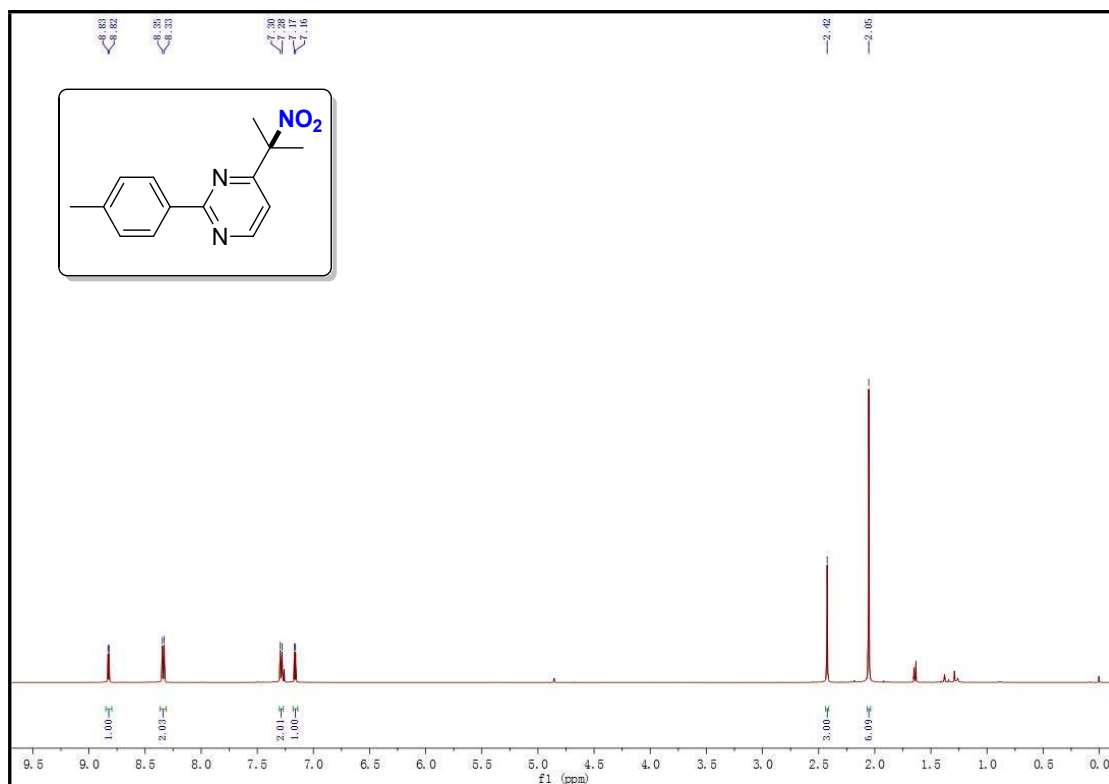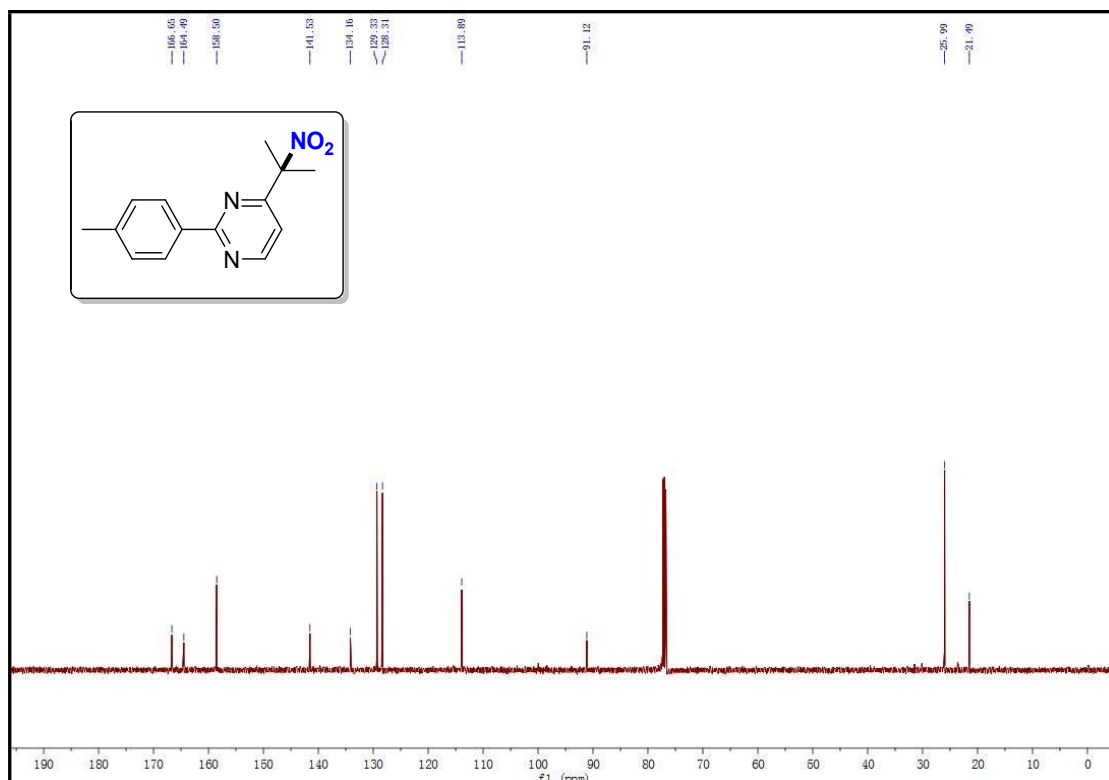

## 2-([1,1'-biphenyl]-4-yl)-4-(2-nitropropan-2-yl)pyrimidine (2c)

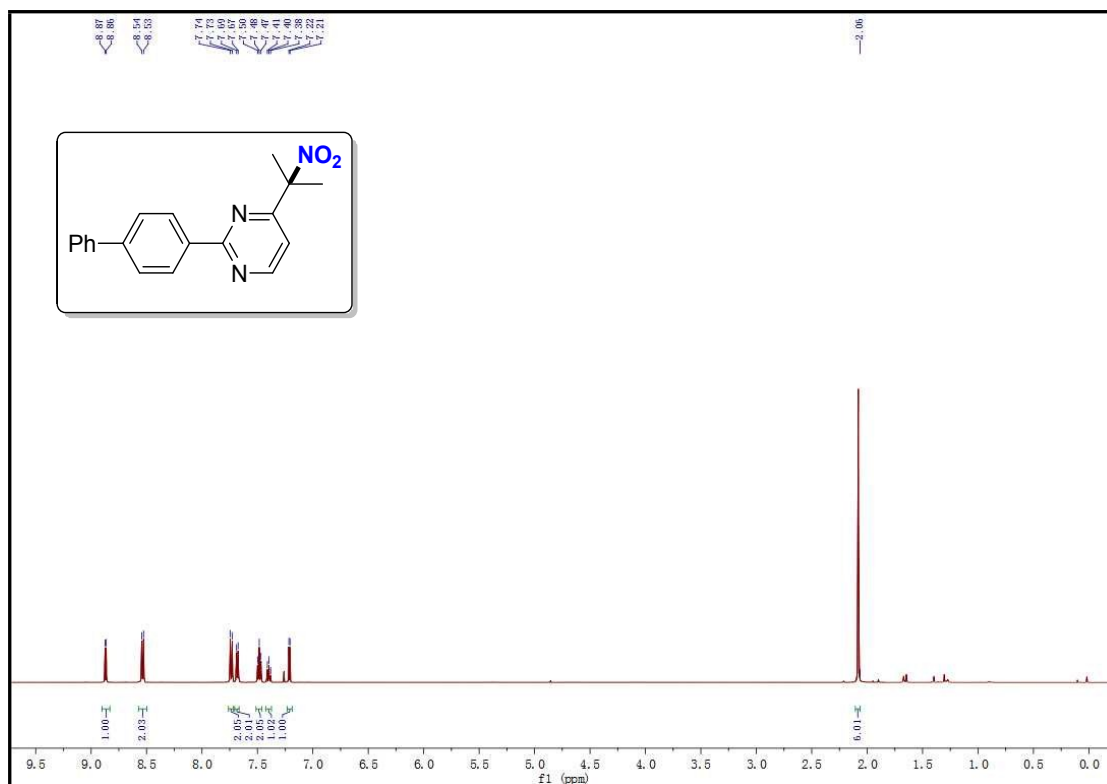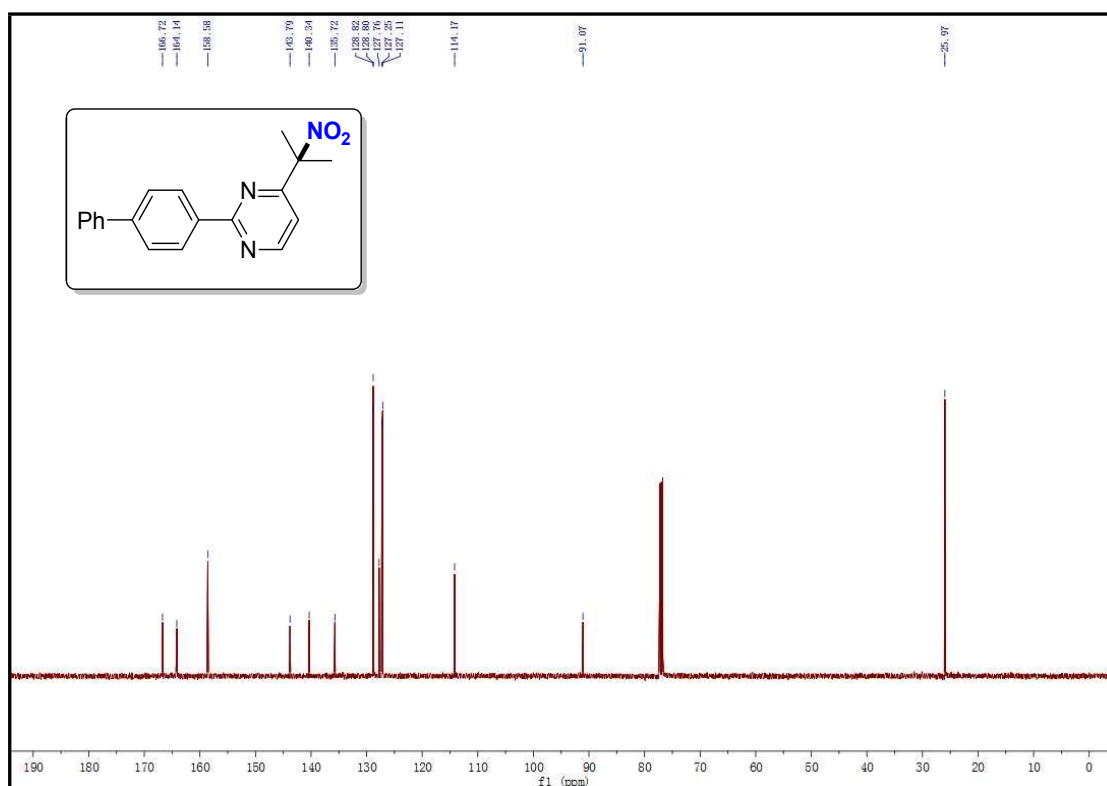

## 2-(3-methoxyphenyl)-4-(2-nitropropan-2-yl)pyrimidine (2d)

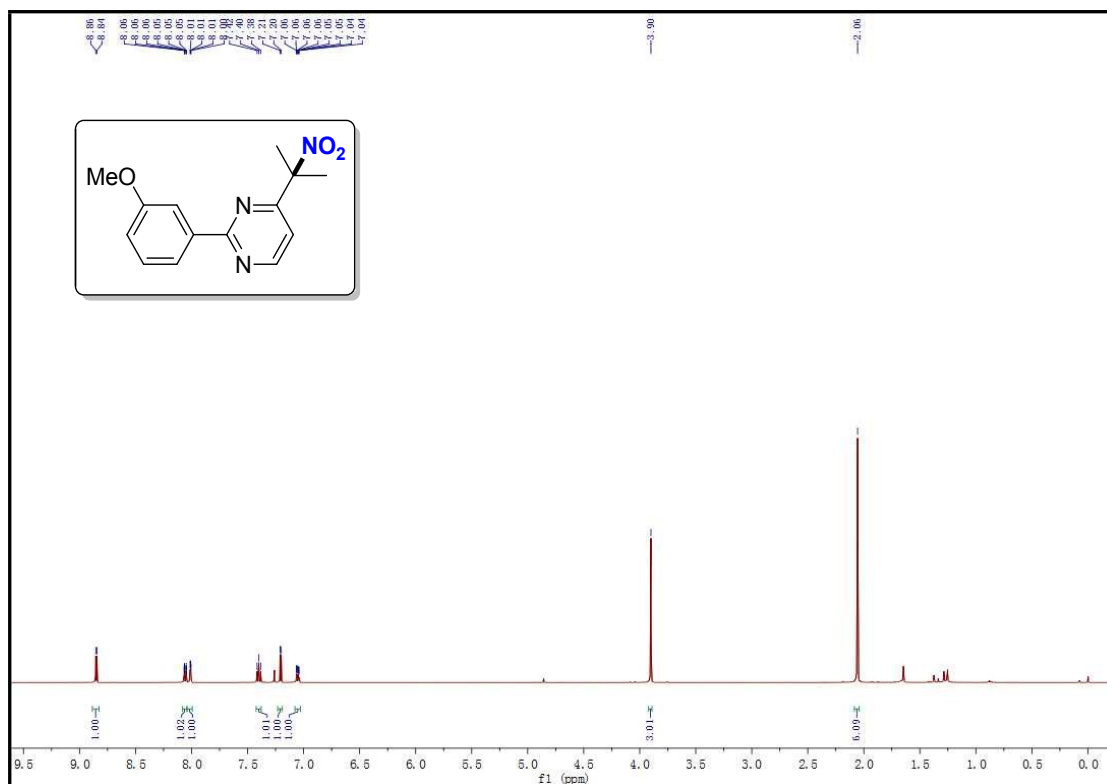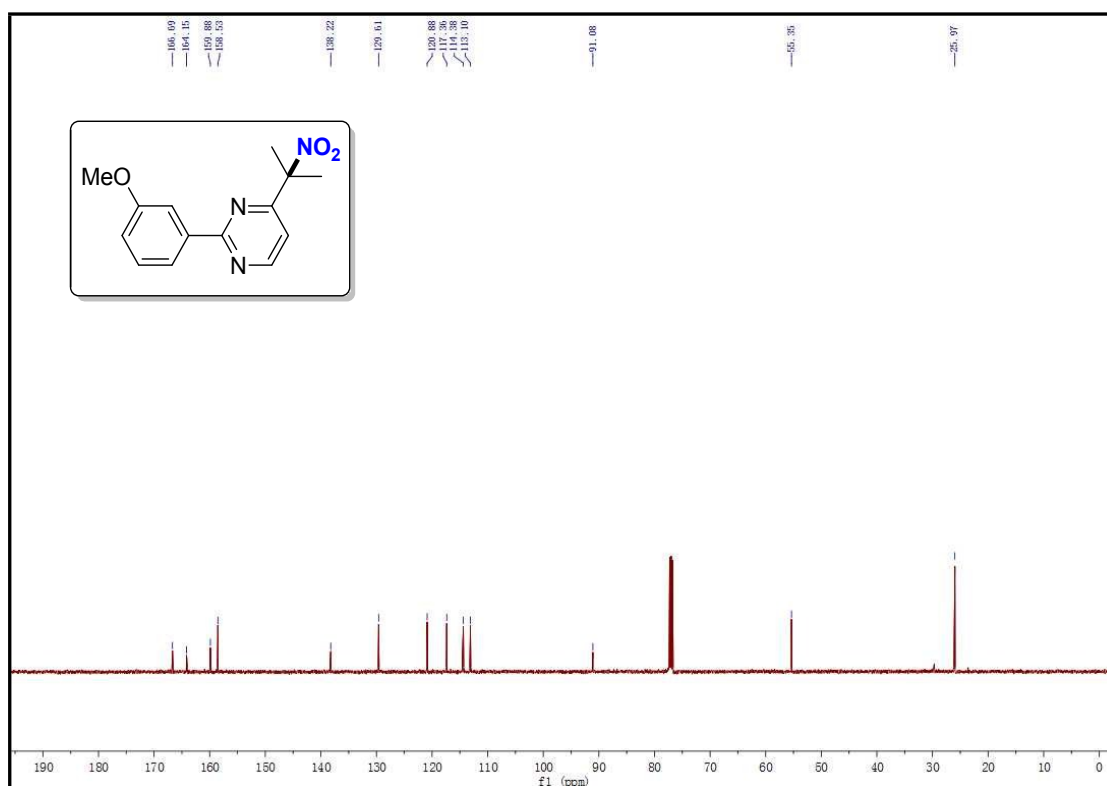

## 2-(2-ethoxyphenyl)-4-(2-nitropropan-2-yl)pyrimidine (2e)

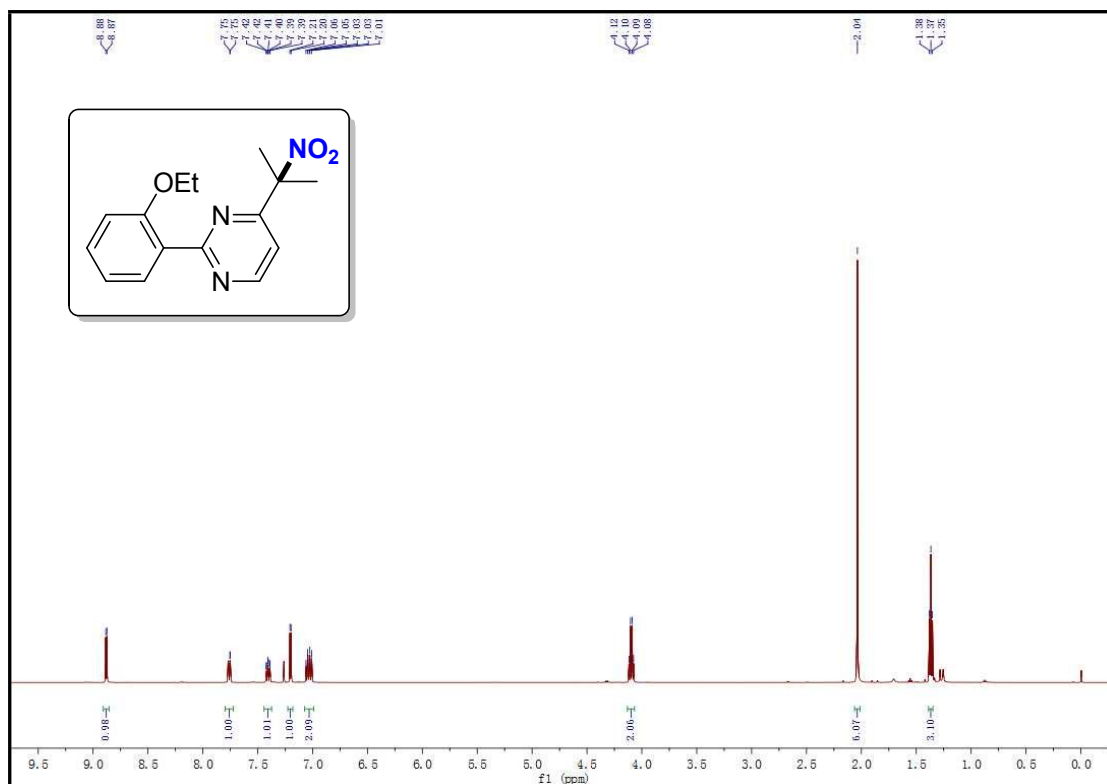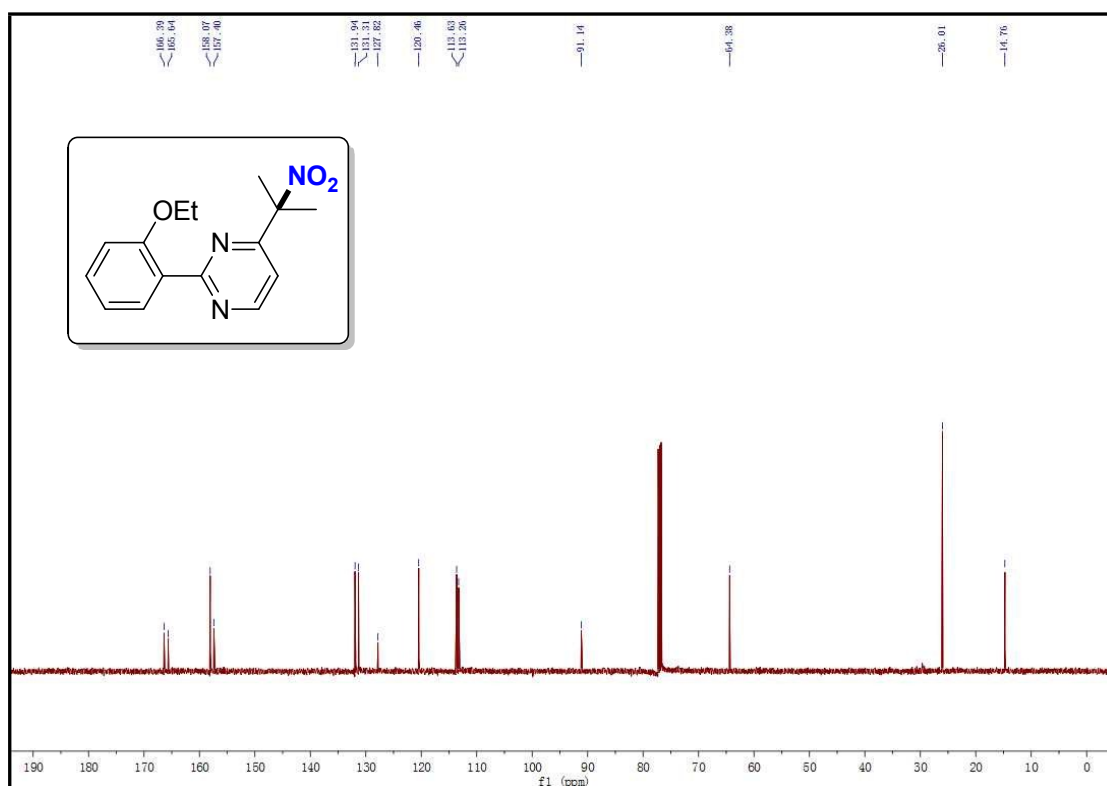

# 4-(2-nitropropan-2-yl)-2-(3-(trifluoromethyl)phenyl)pyrimidine (2f)

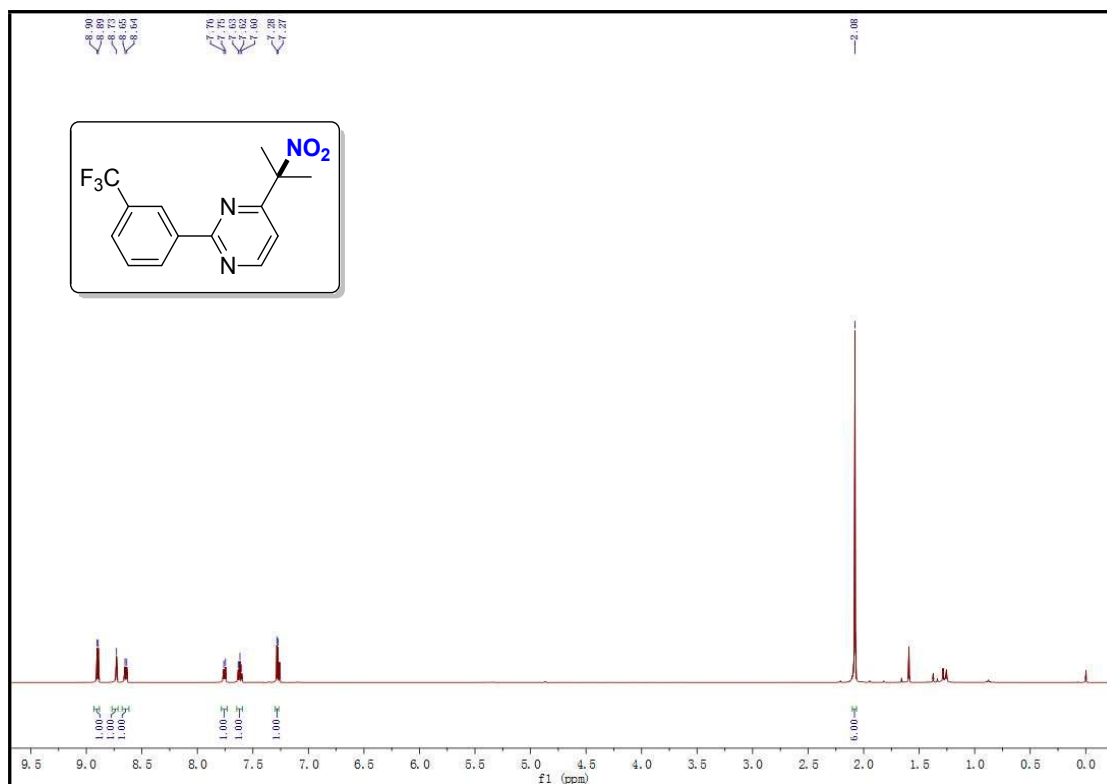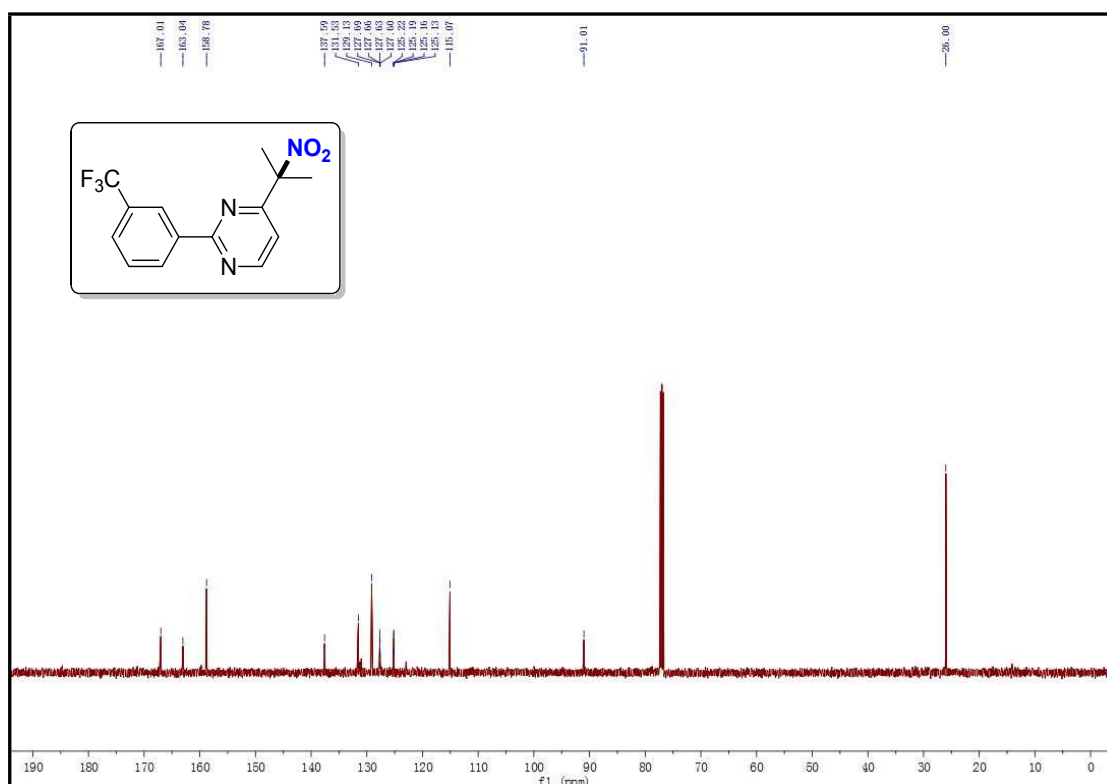

## 2-(4-nitrophenyl)-4-(2-nitropropan-2-yl)pyrimidine (2g)

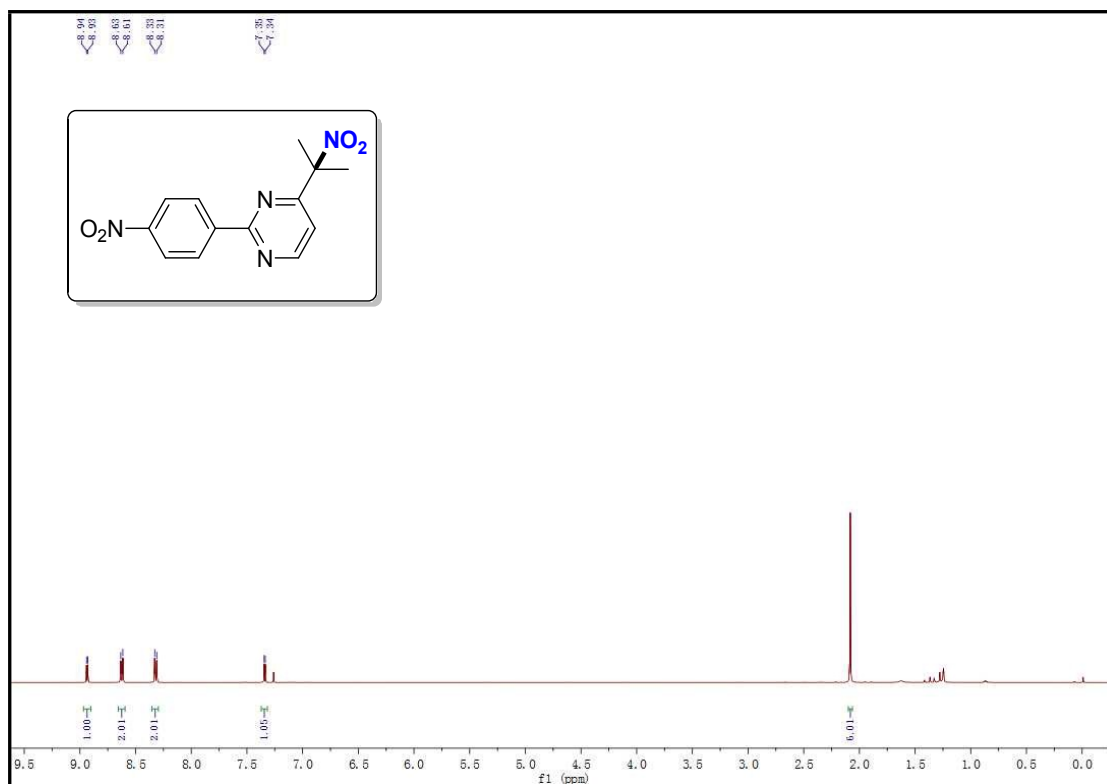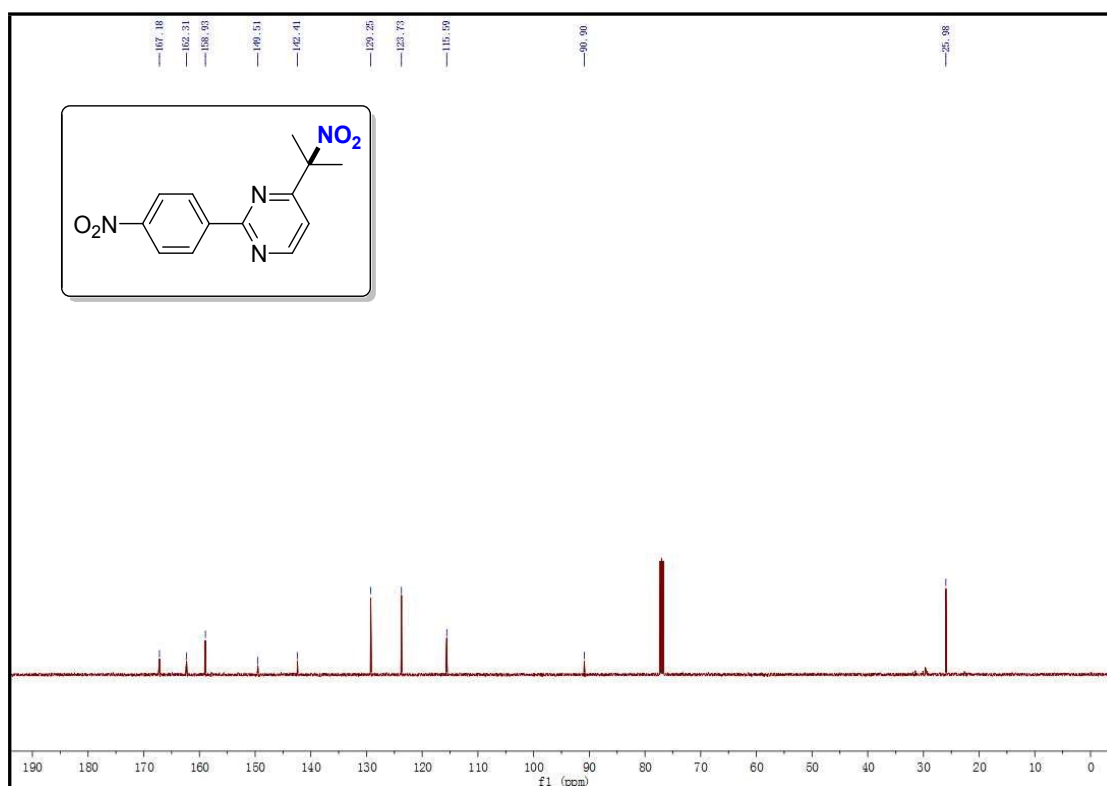

**ethyl4'-(4-(2-nitropropan-2-yl)pyrimidin-2-yl)-[1,1'-biphenyl]-4-carboxylate (2h)**

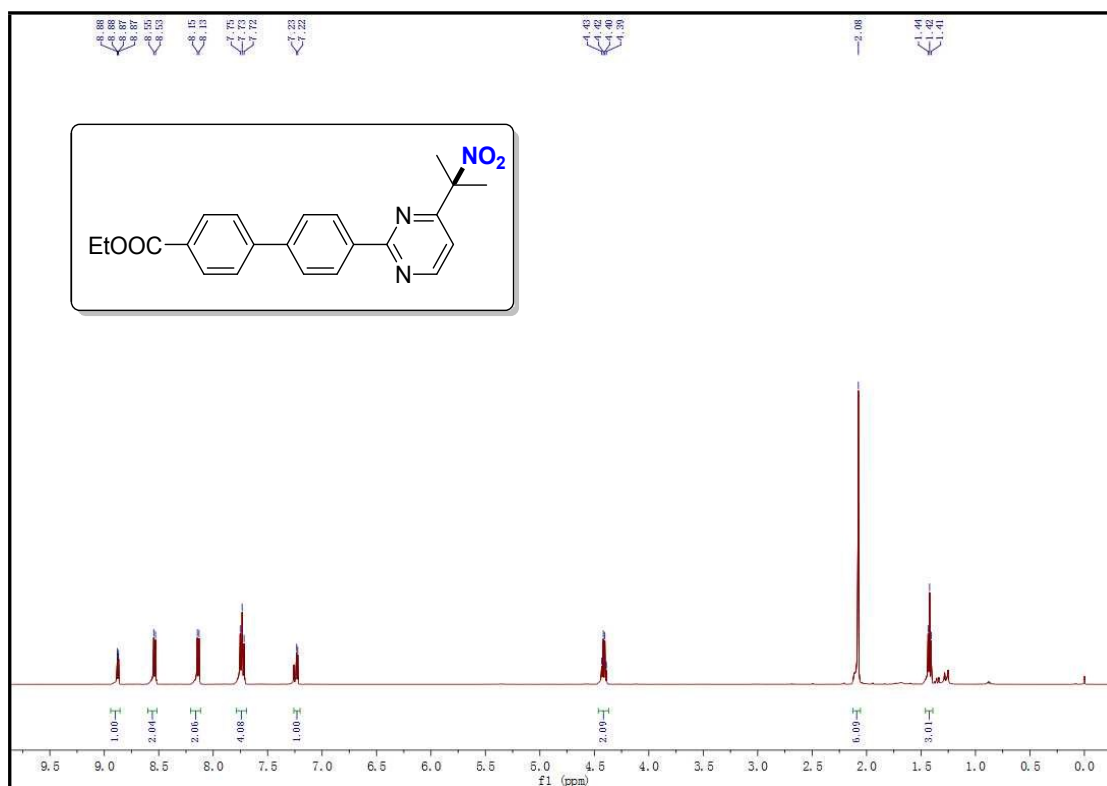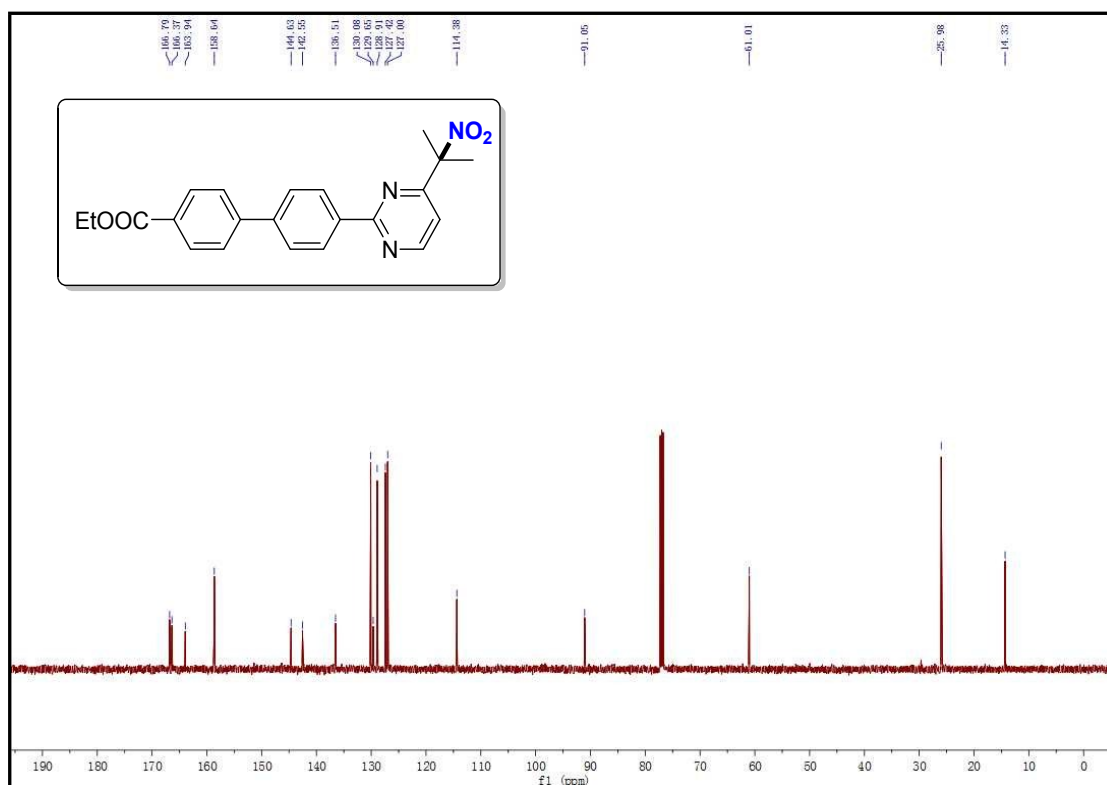

## 2-(4-chlorophenyl)-4-(2-nitropropan-2-yl)pyrimidine (2i)

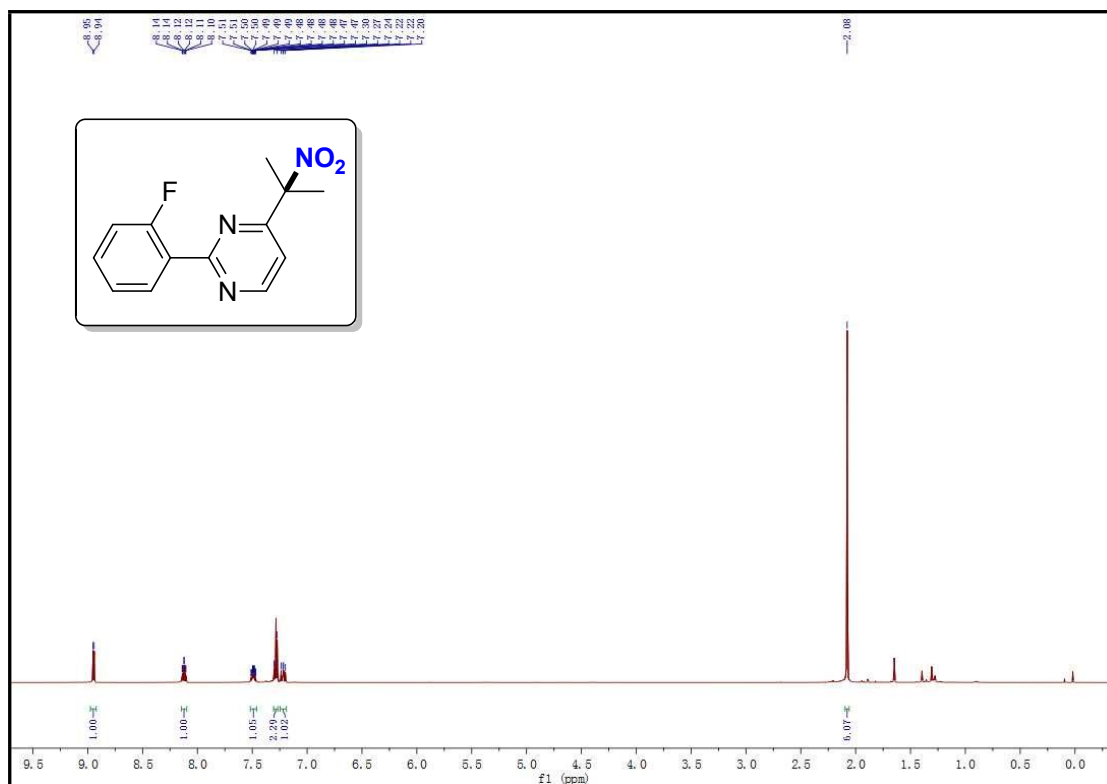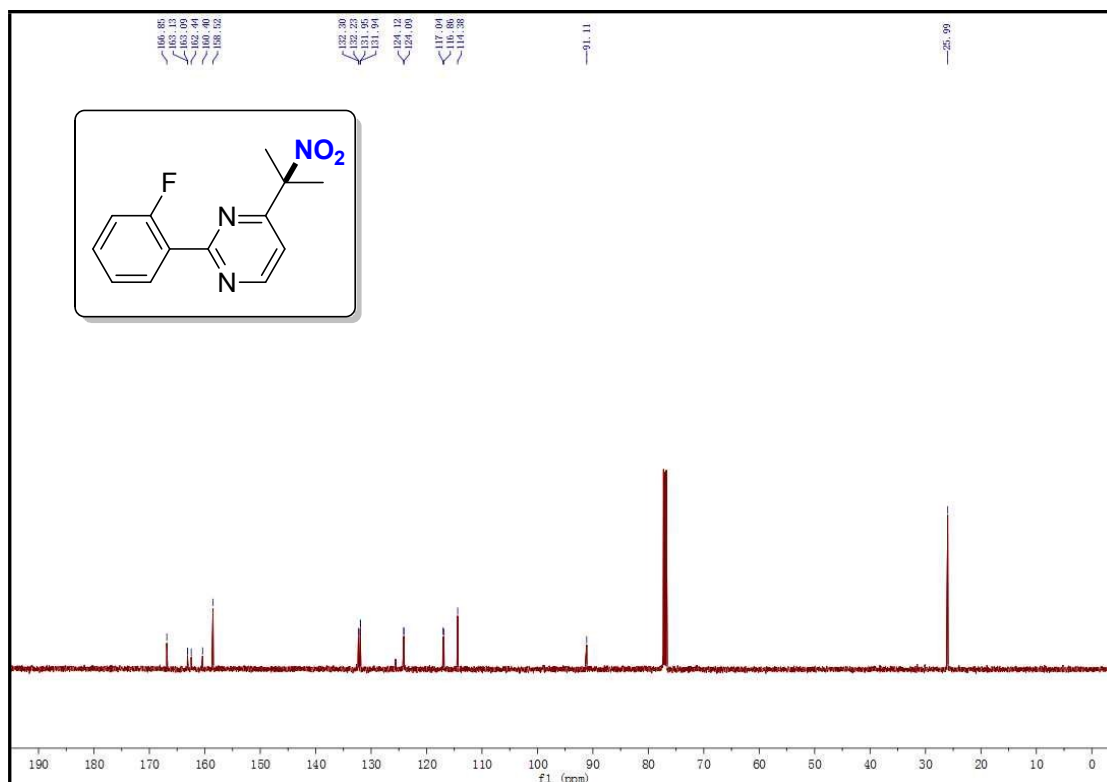



## 2-(4-chlorophenyl)-4-(2-nitropropan-2-yl)pyrimidine (2j)

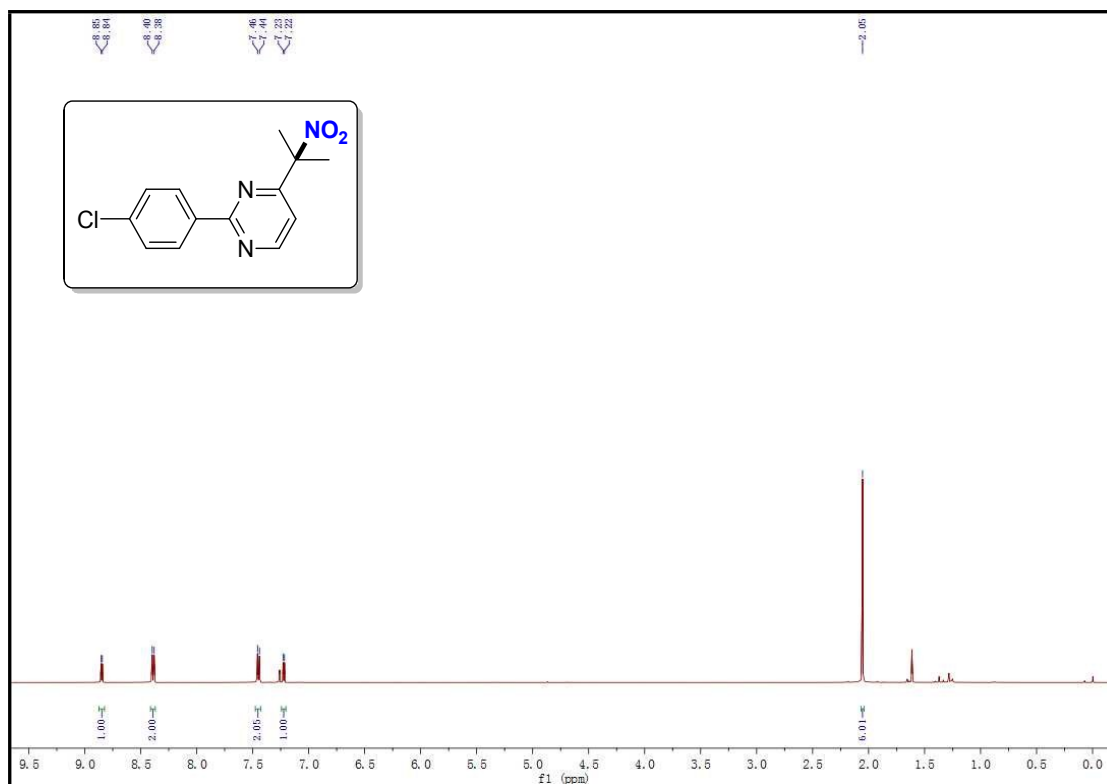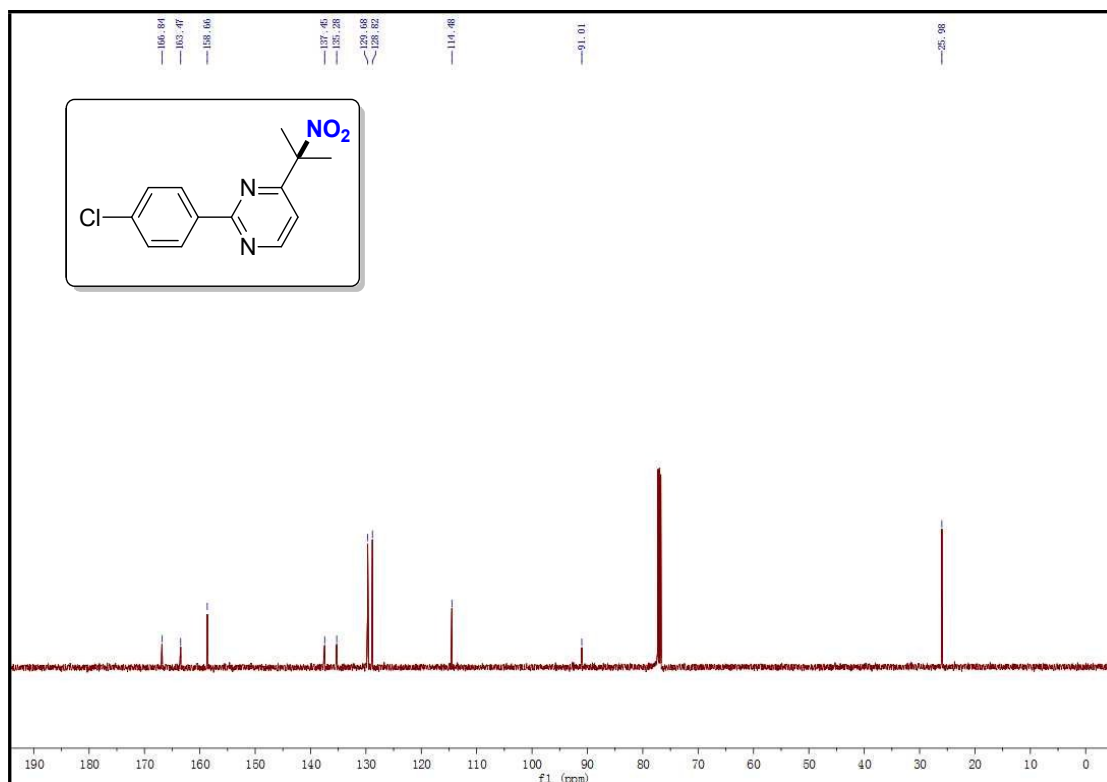

## 2-(4-bromophenyl)-4-(2-nitropropan-2-yl)pyrimidine (2k)

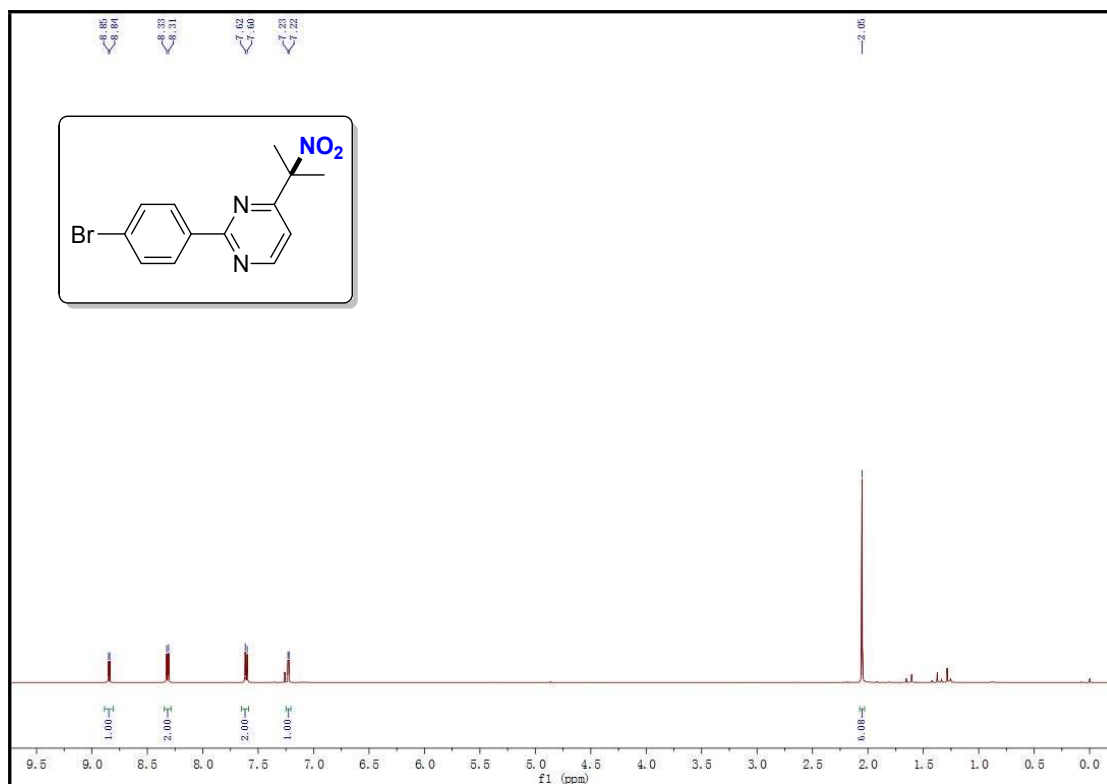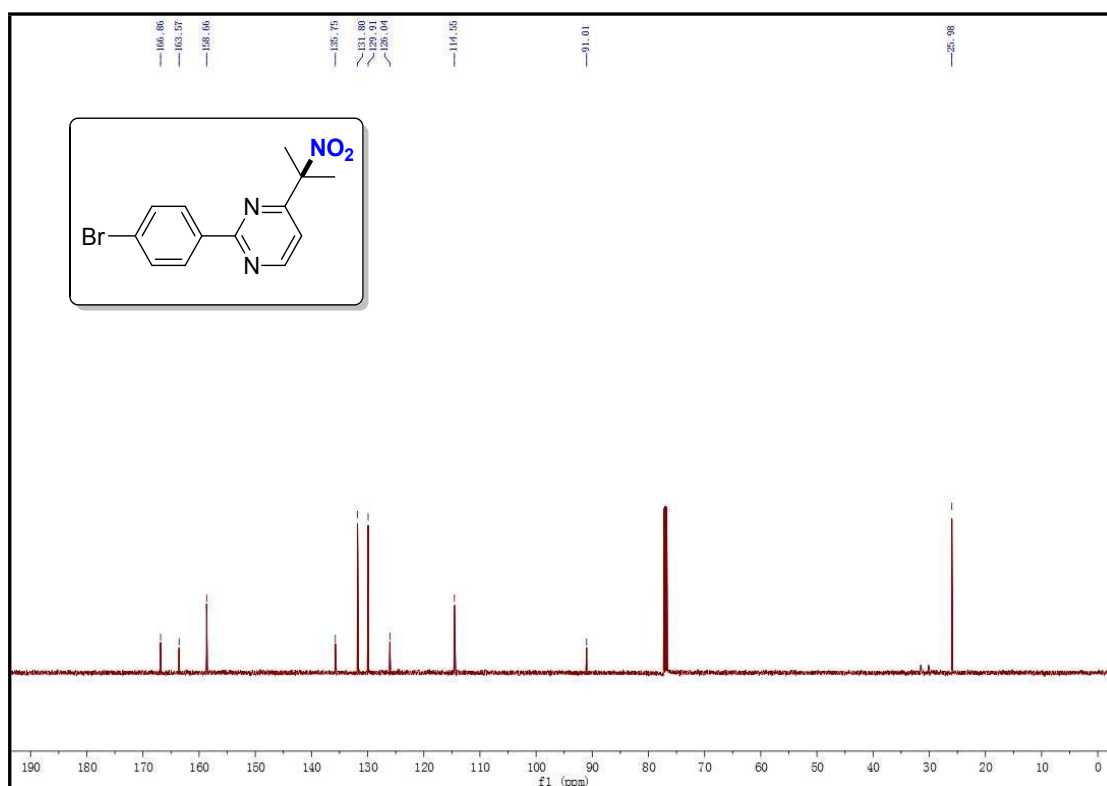

**1-(2-fluorobenzyl)-3-(4-(2-nitropropan-2-yl)pyrimidin-2-yl)-1H-pyrazolo[4,3-b]pyridine (2l)**

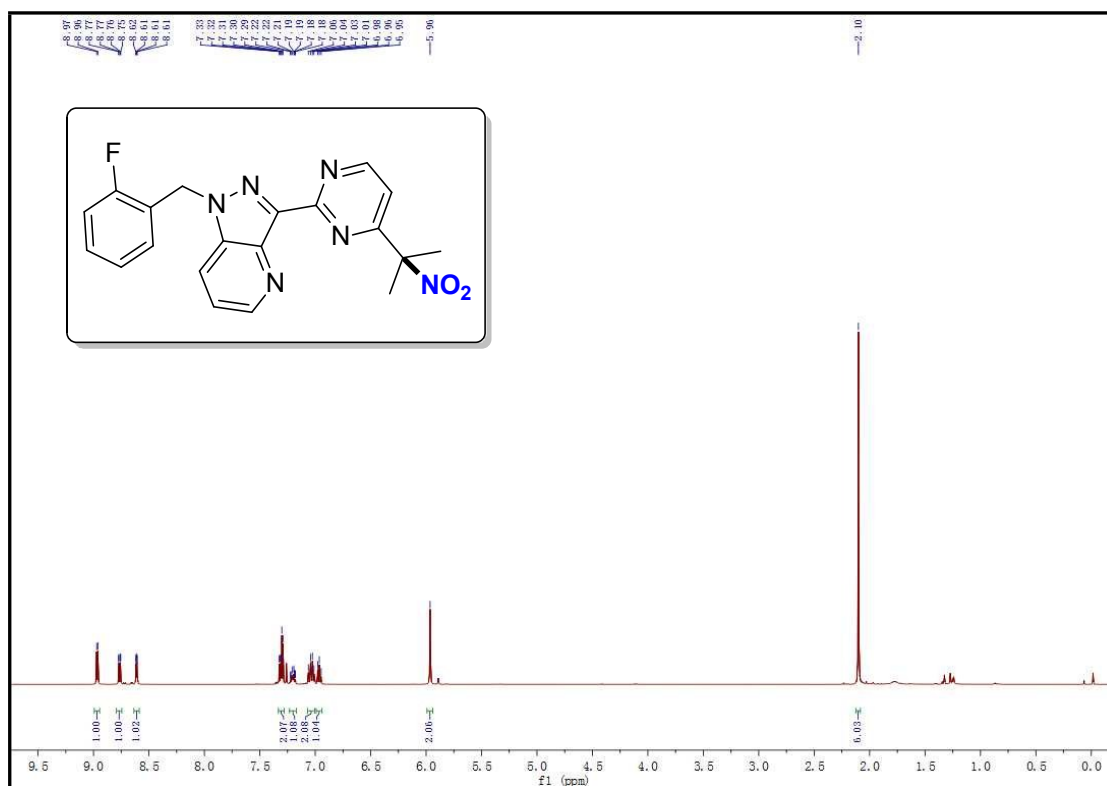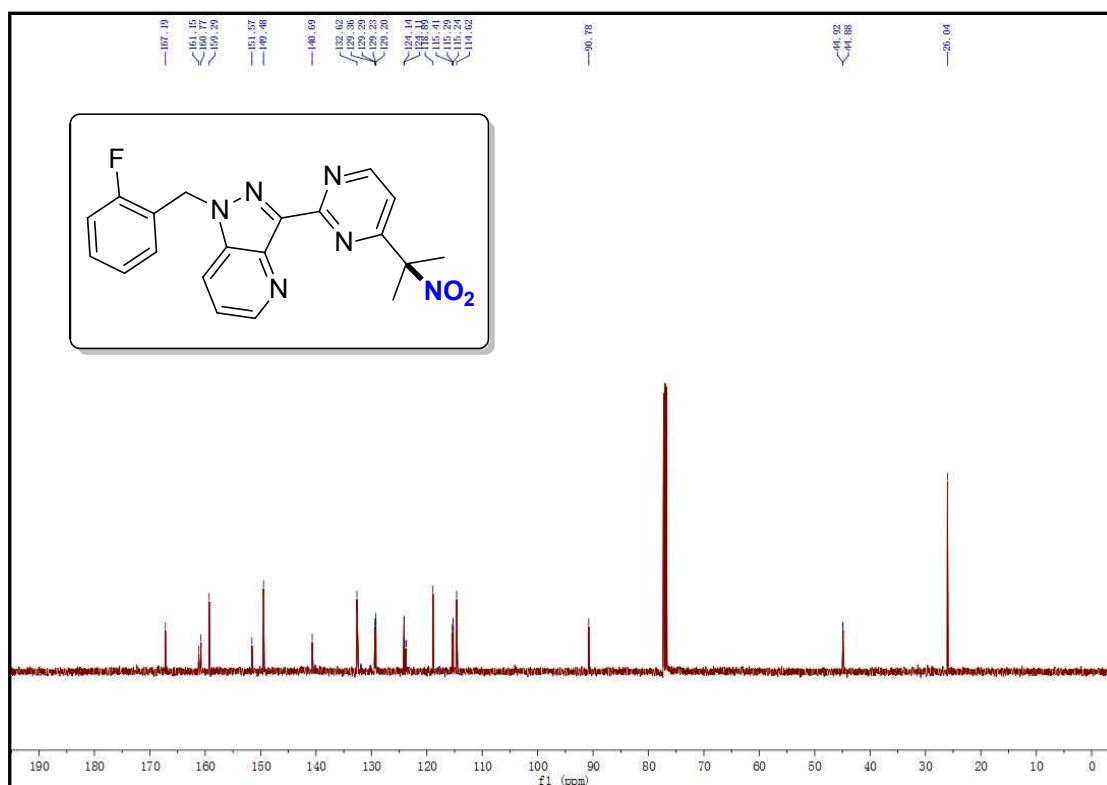

# 4-(2-nitropropan-2-yl)-2-(1H-pyrazol-1-yl)pyrimidine (2m)

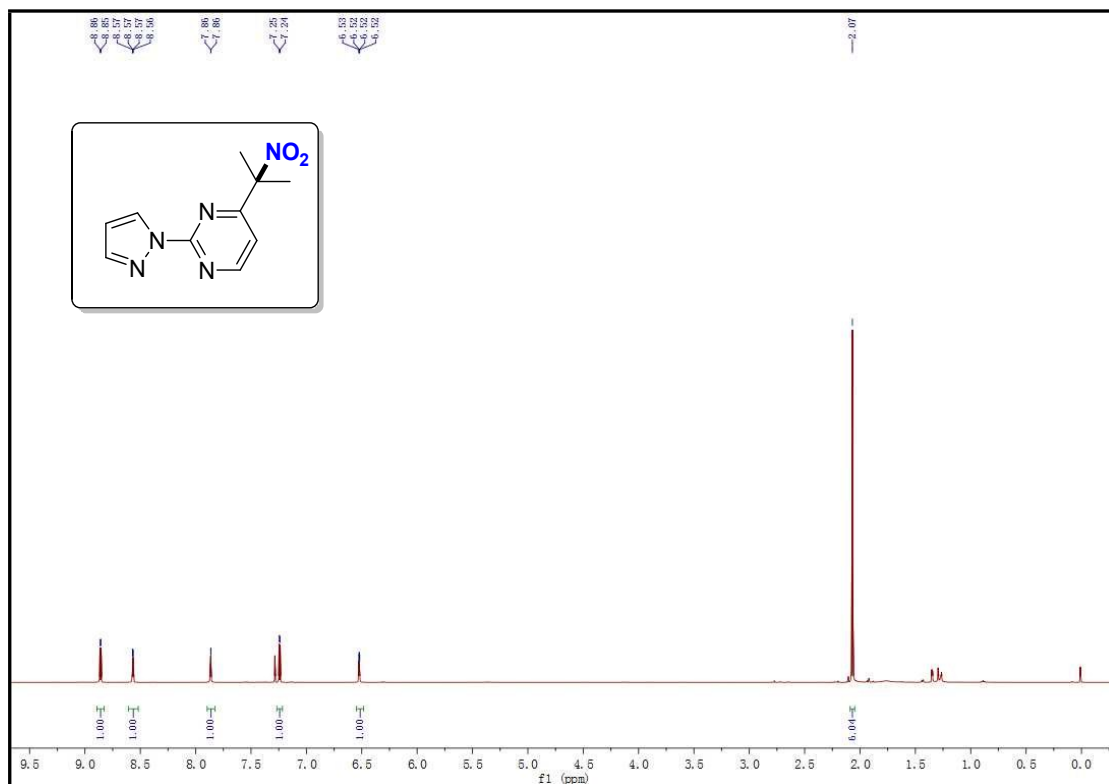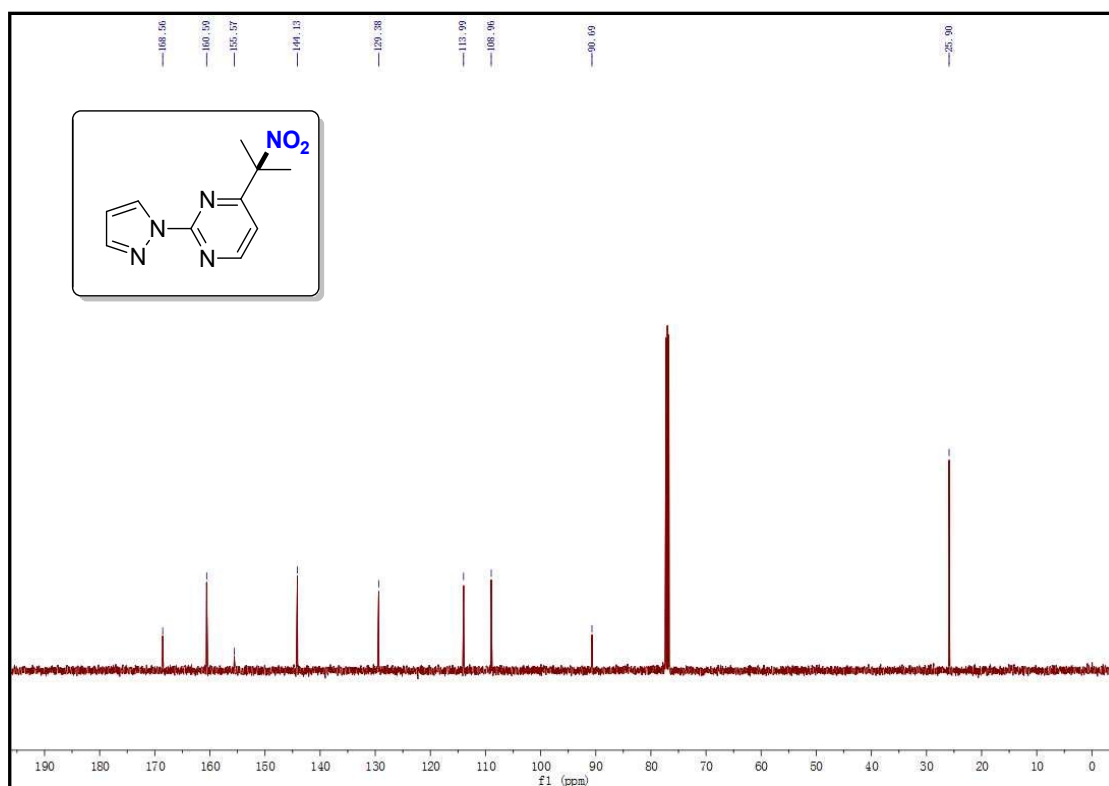

# 4-(3-nitropentan-3-yl)-2-phenylpyrimidine (2o)

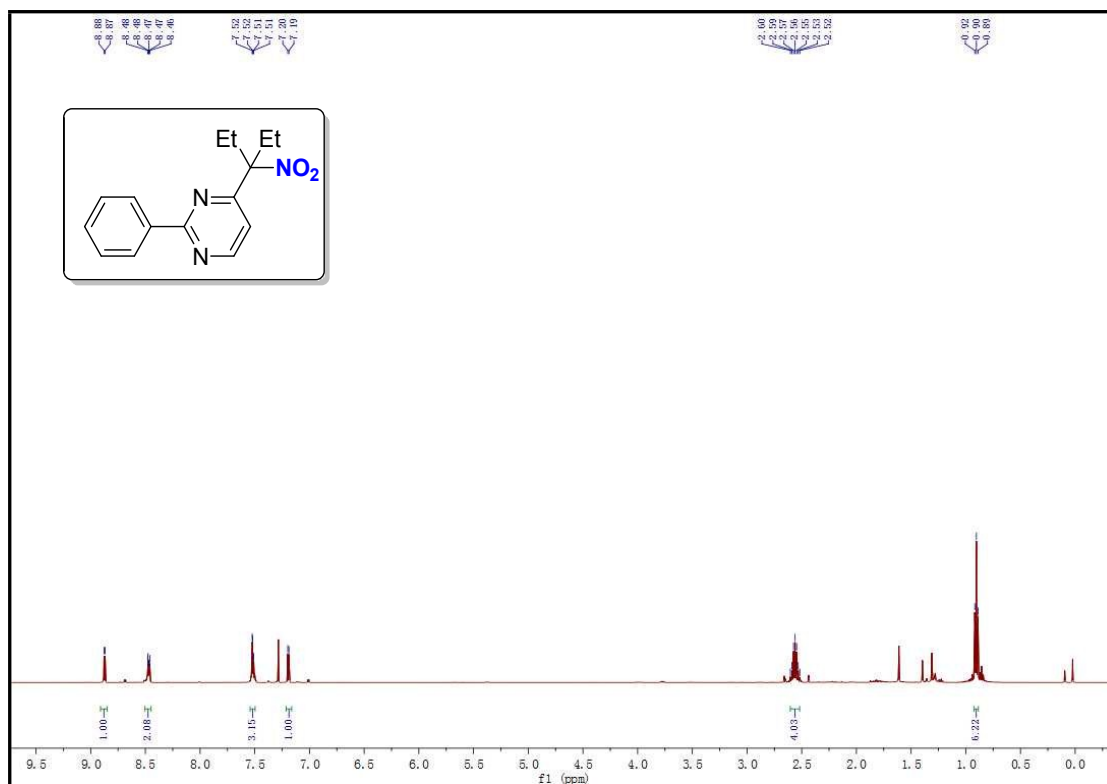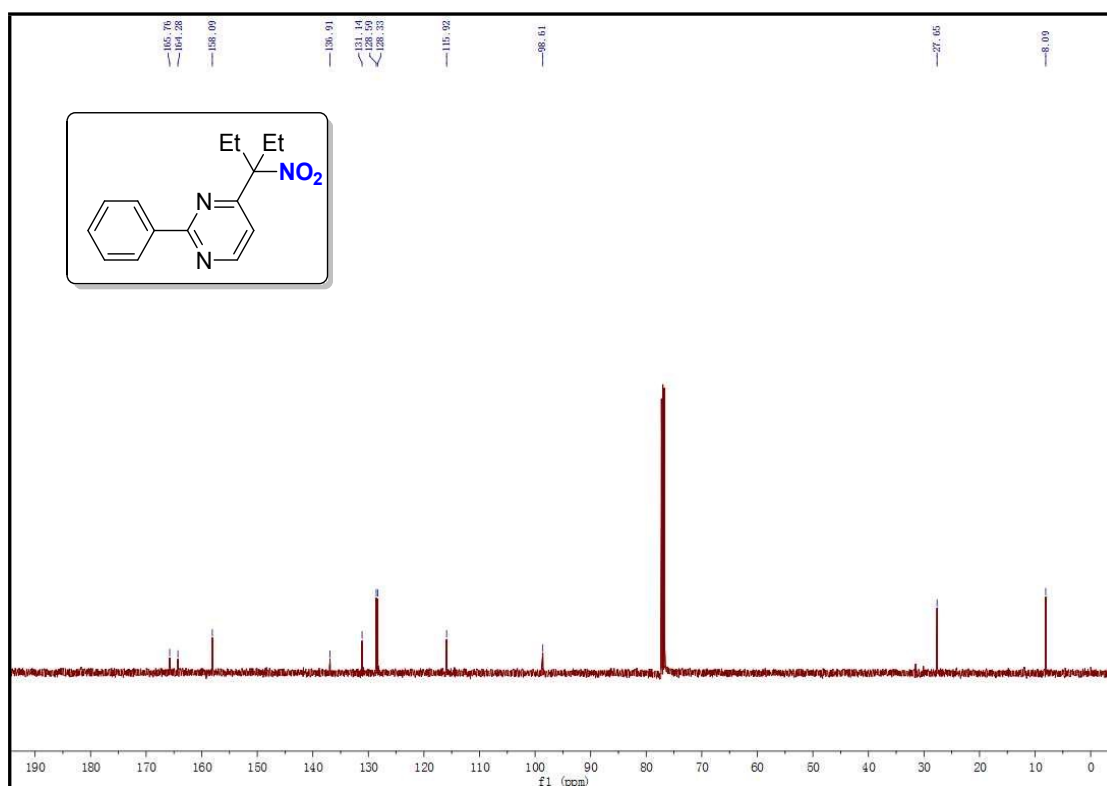

# 4-(2-nitrobutan-2-yl)-2-phenylpyrimidine (2p)

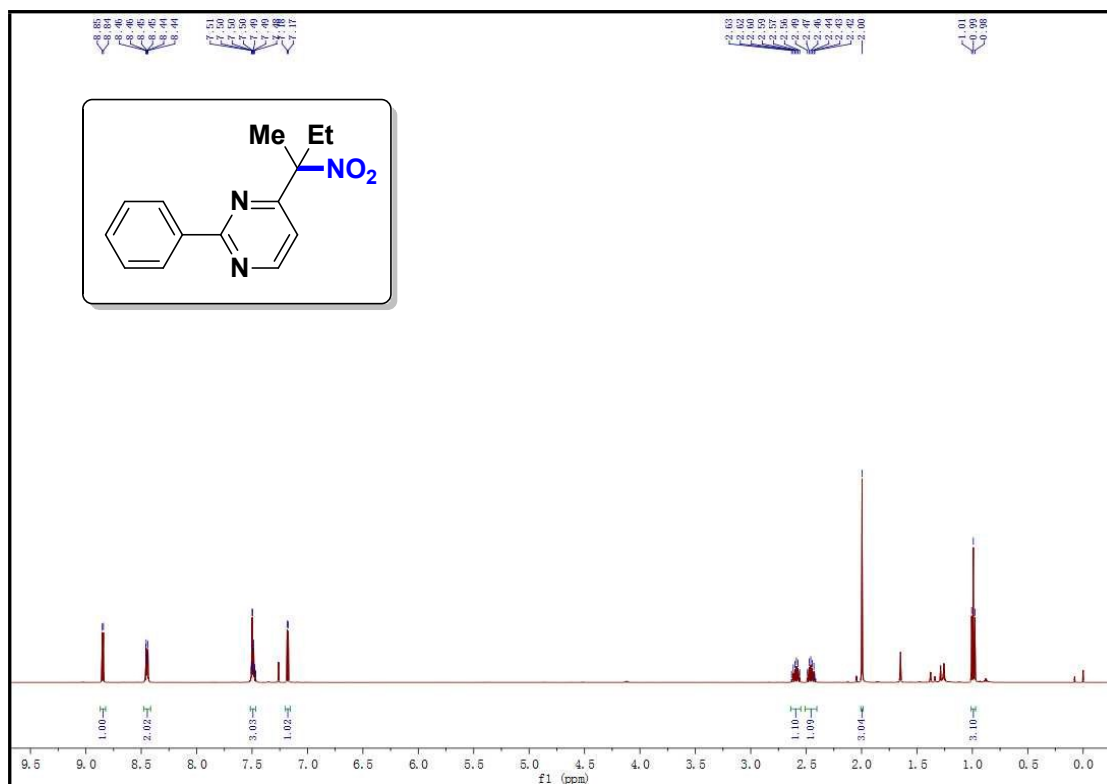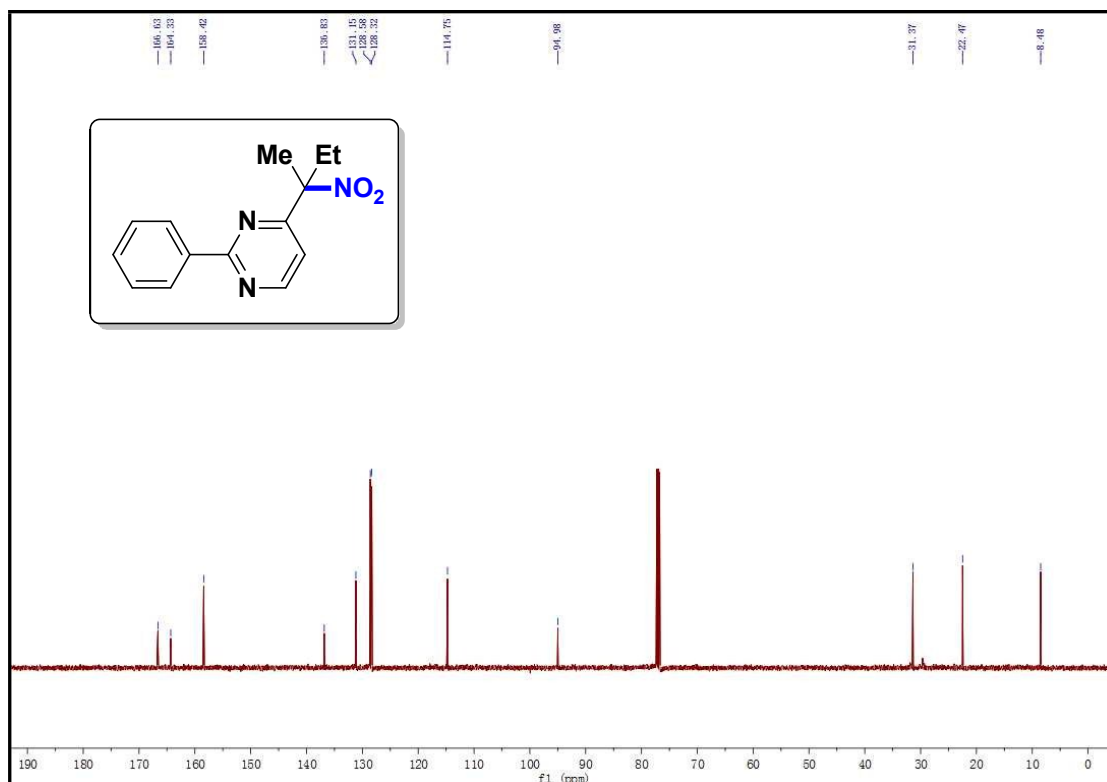

# 4-(1-nitrocyclohexyl)-2-phenylpyrimidine (2q)

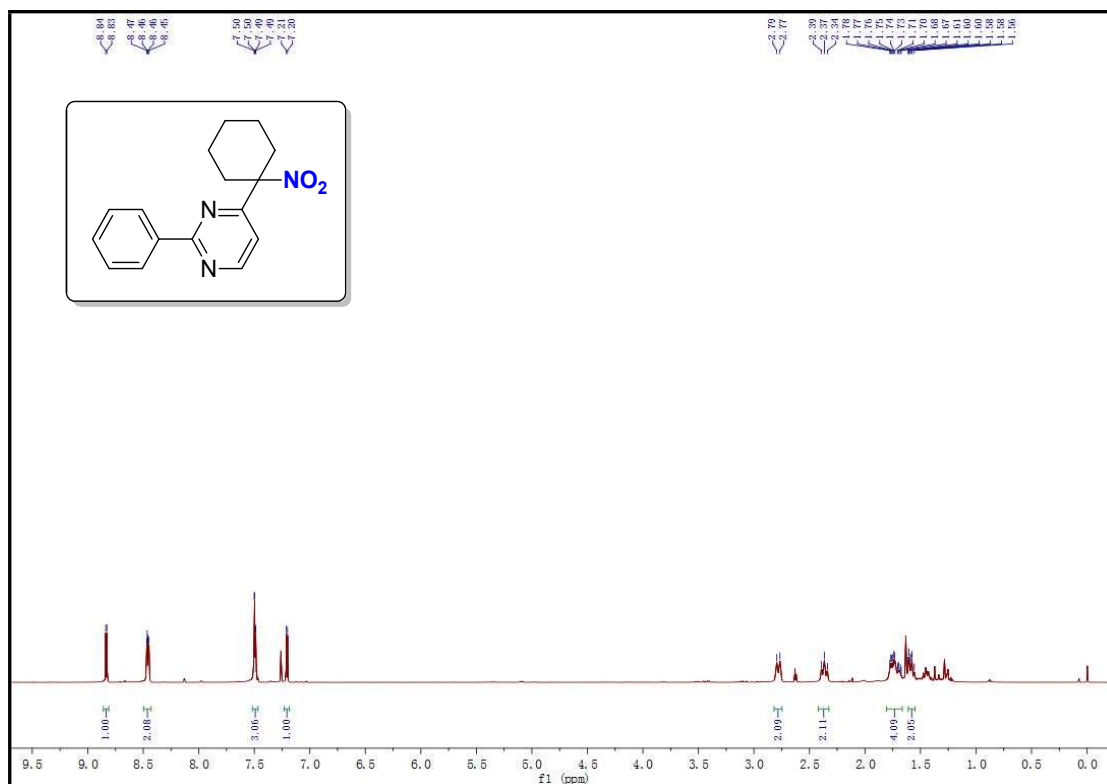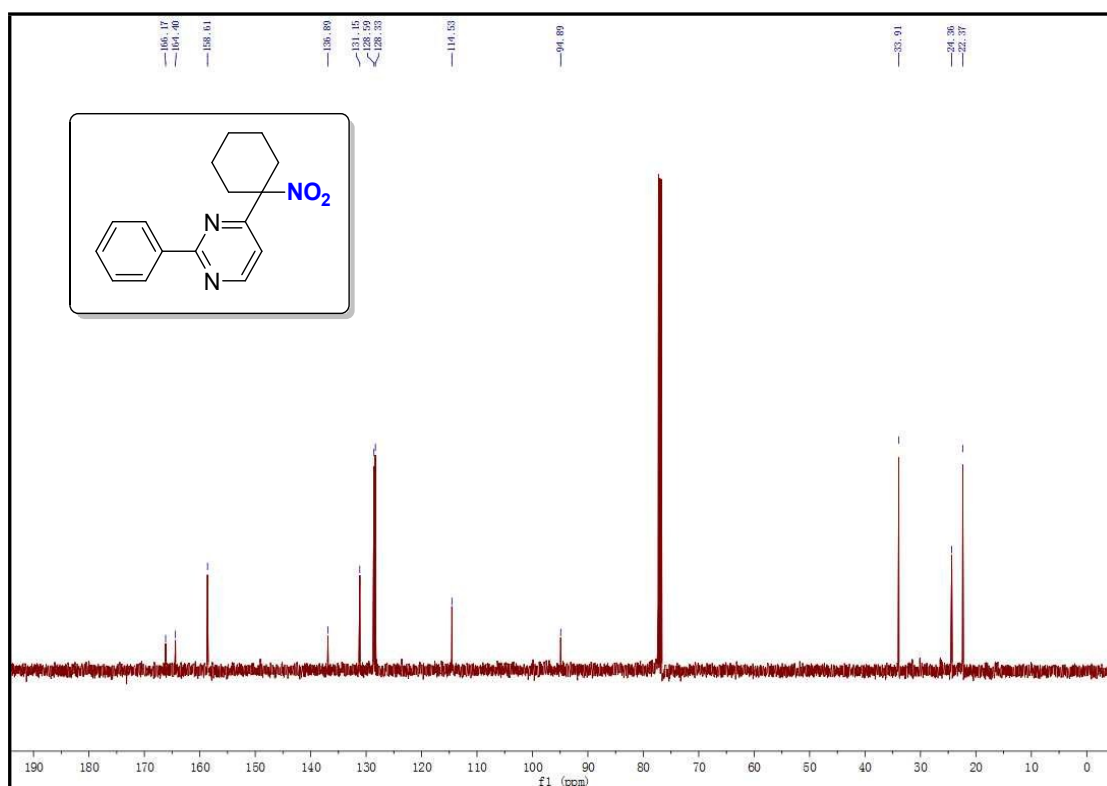

## 4-(1-nitrocyclopentyl)-2-phenylpyrimidine (2r)

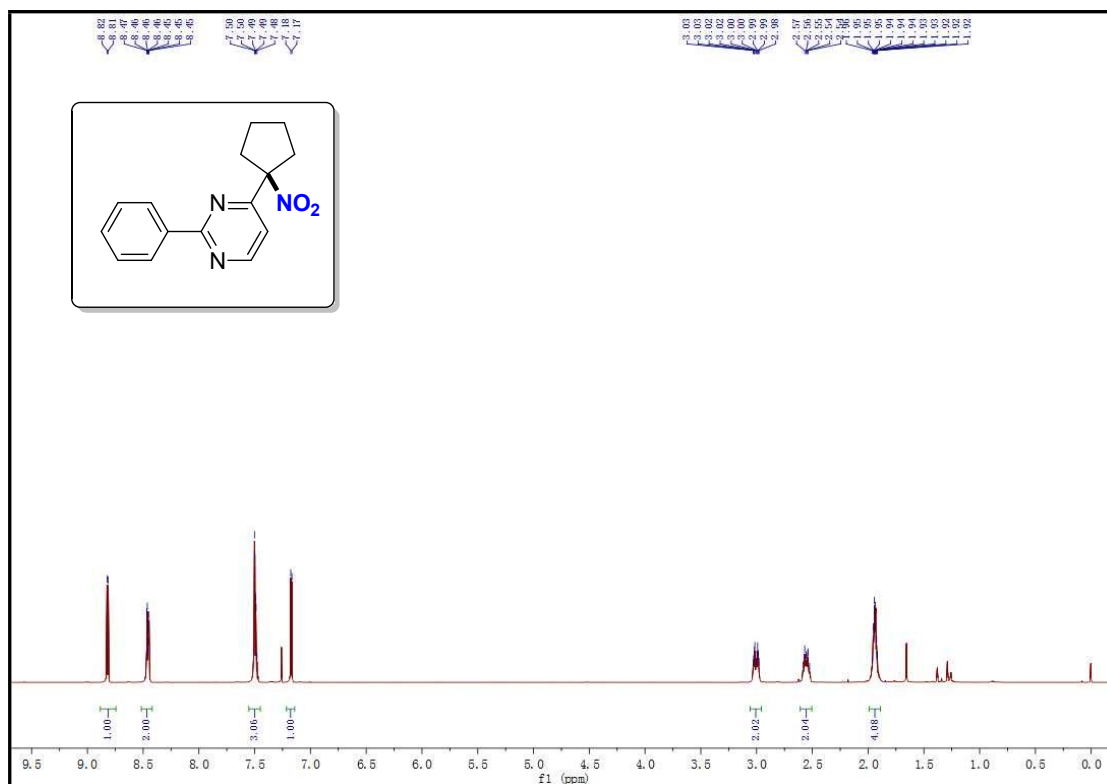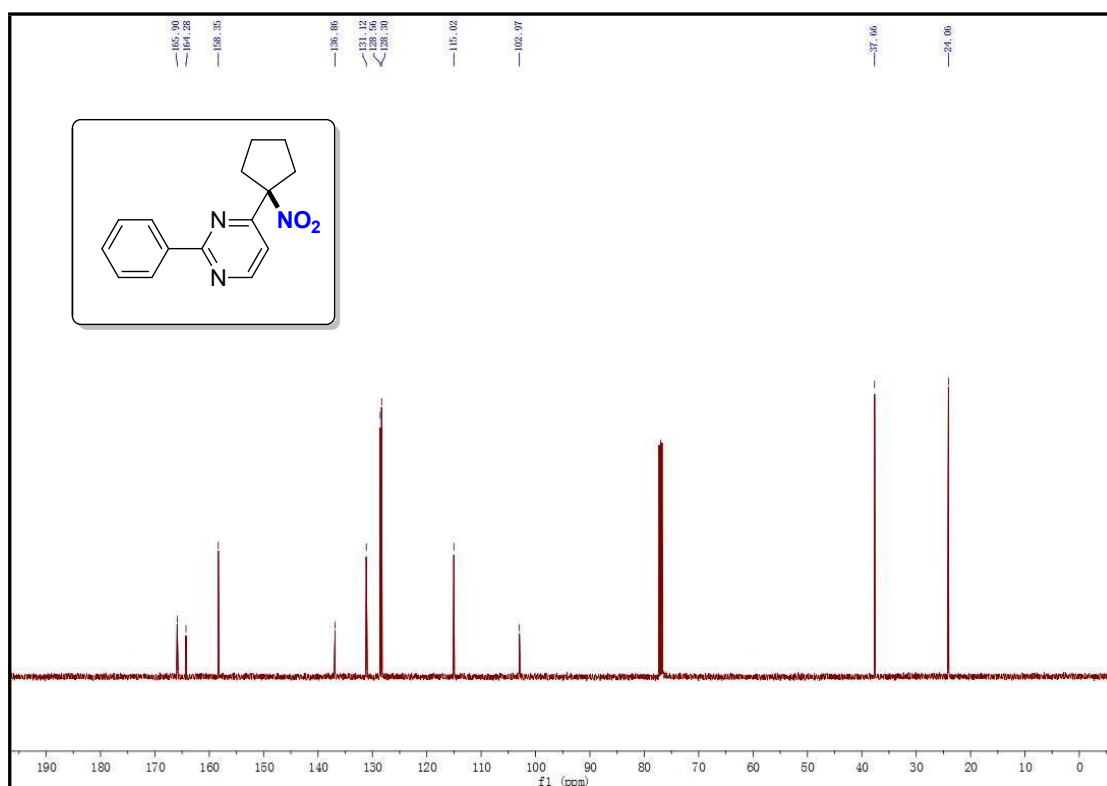



## 2-cyclopropyl-4-(1-nitrocyclohexyl)pyrimidine (2u)

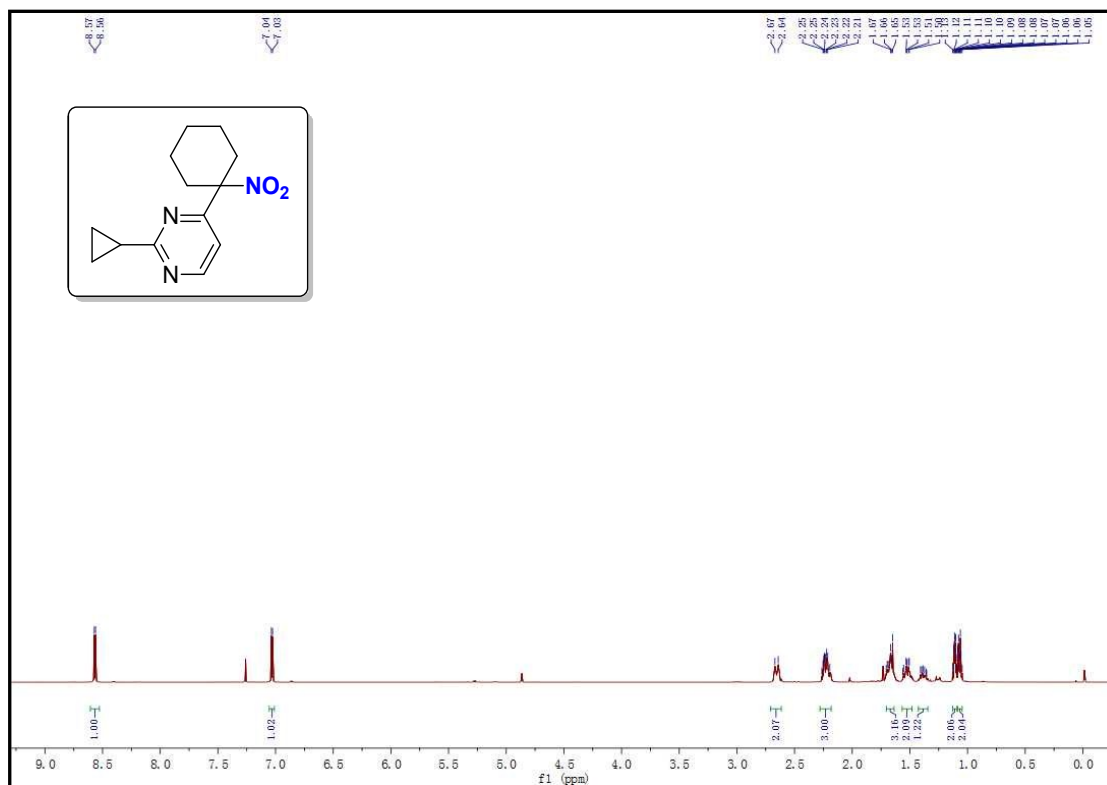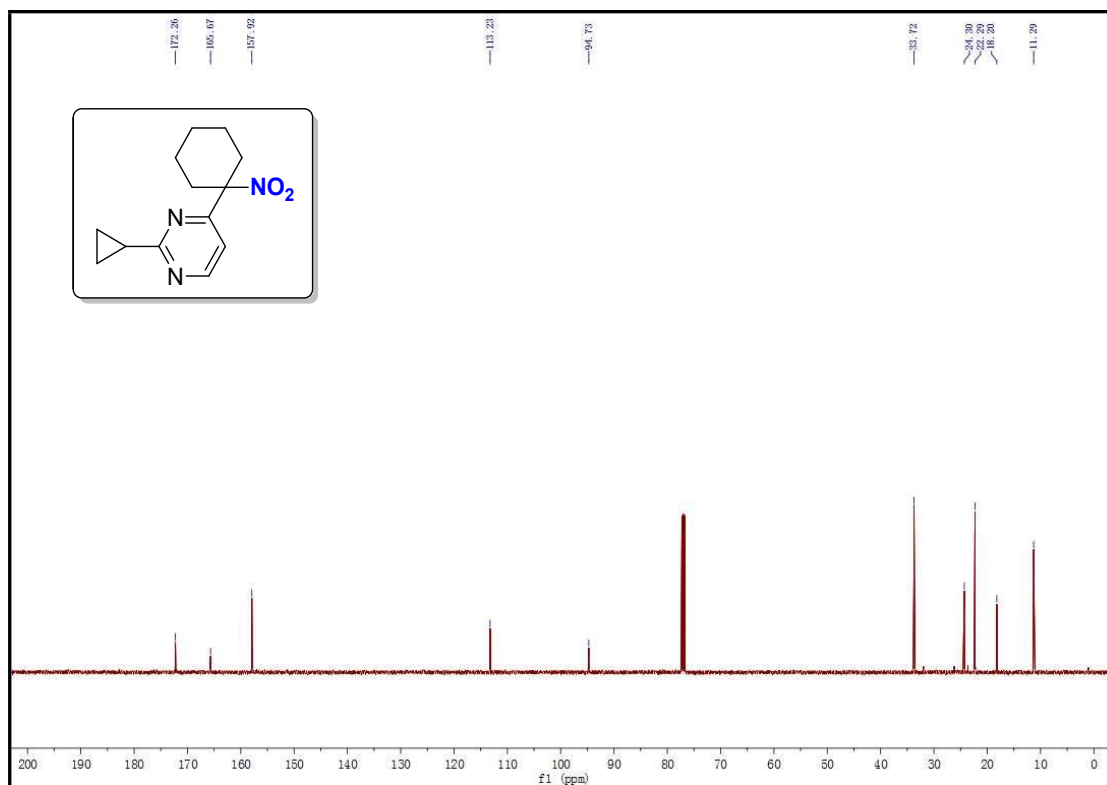

## 2-cyclopropyl-4-(1-nitrocyclopentyl)pyrimidine (2v)

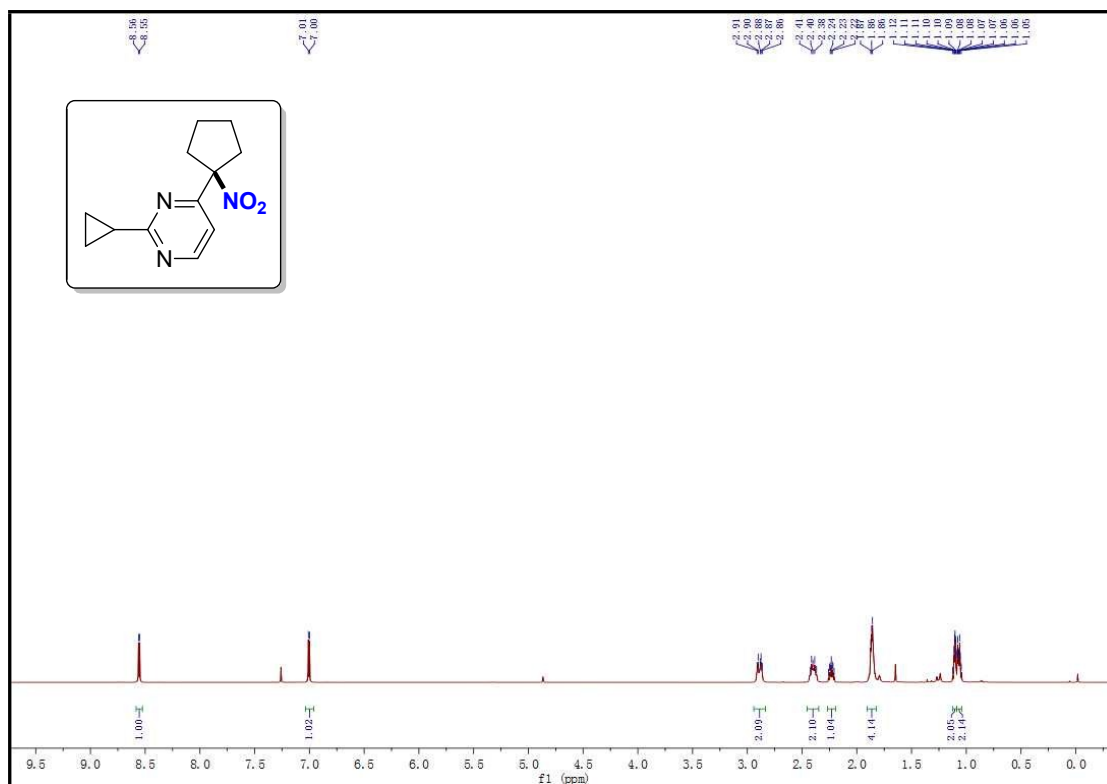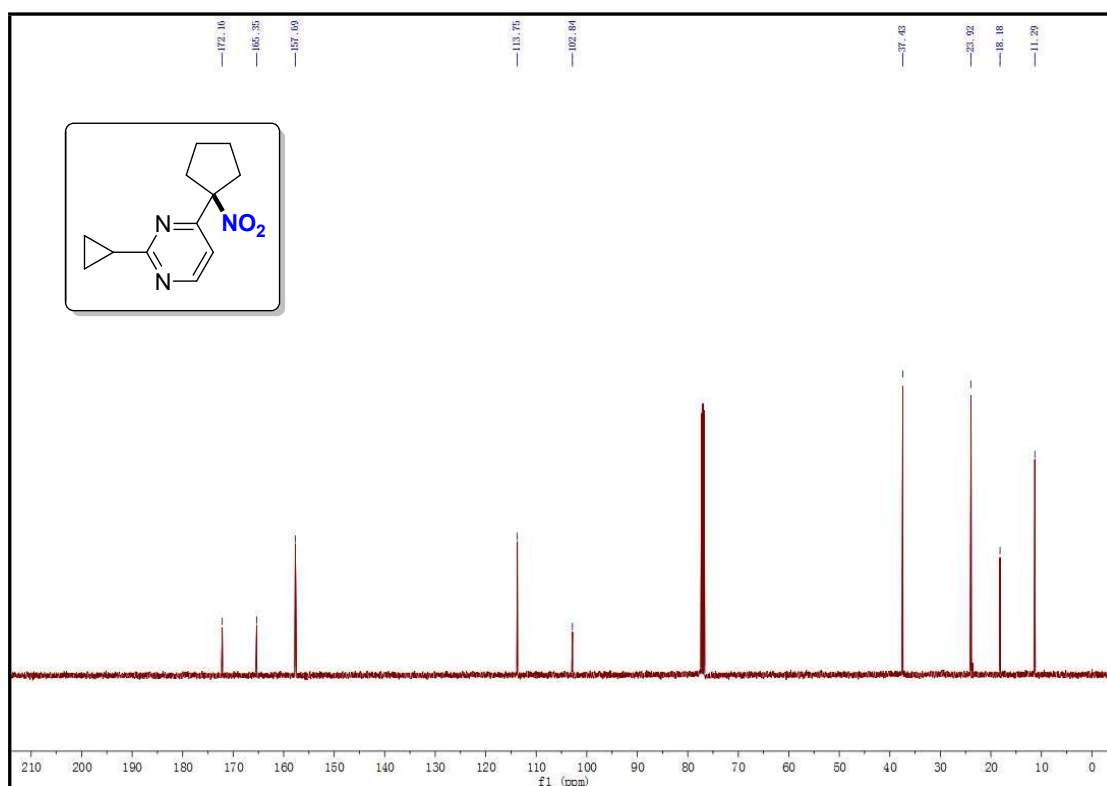

**2-cyclopropyl-4-(2-nitropropan-2-yl)pyrimidine(2w)**

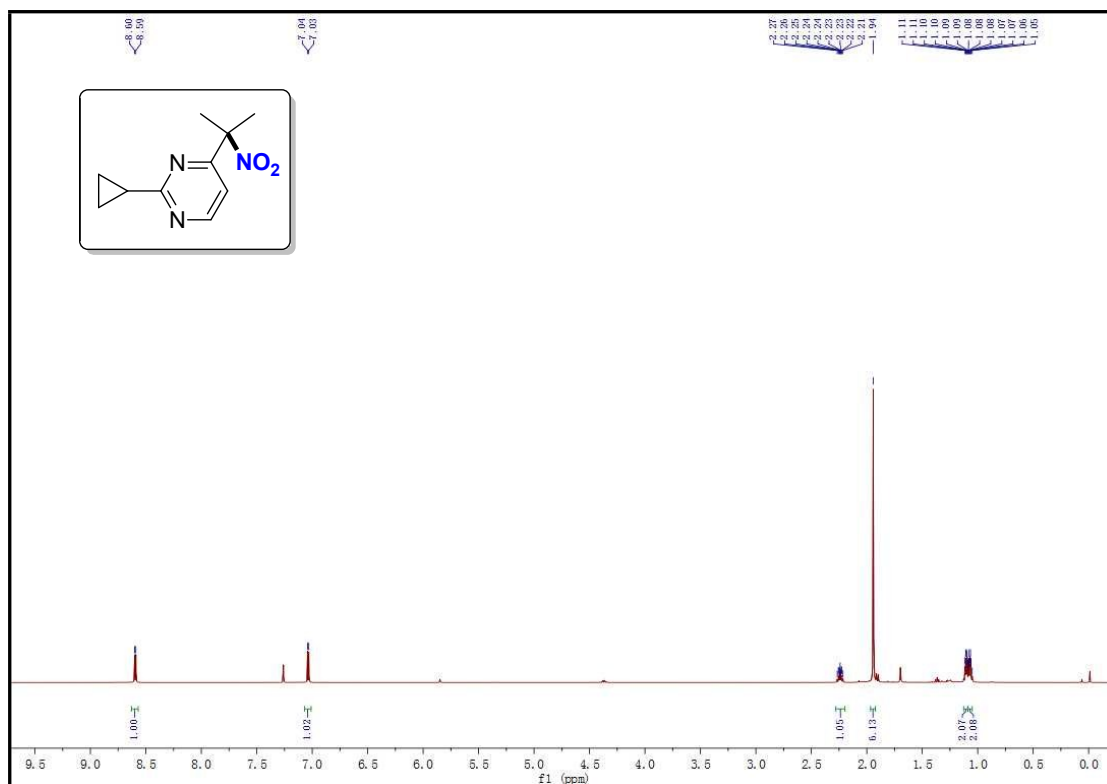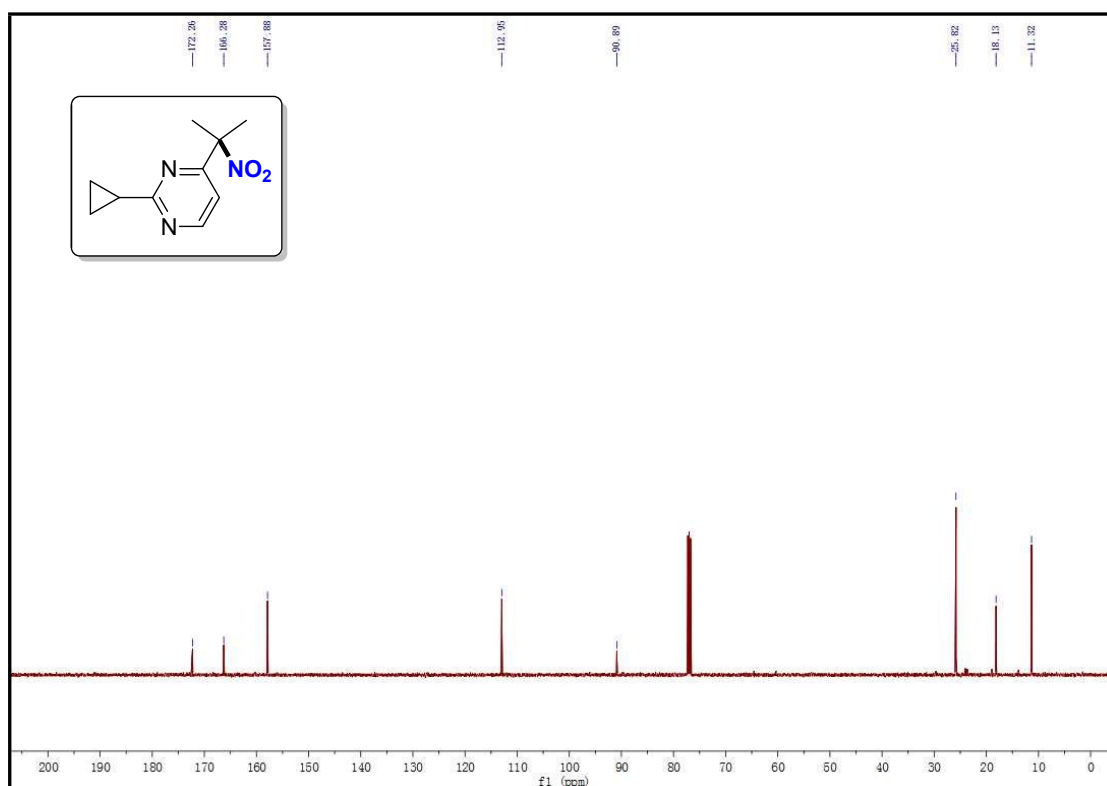

Supplement: c7cc04433j1.pdf [file c7cc04433j1.pdf]
